# Supplementary material for: Targeted Blood Plasma Proteomics and Hemostasis Assessment of Post COVID-19 Patients with Acute Myocardial Infarction
Source: MDPI journal article supplement (doi:10.3390/ijms24076523), 2023-03-30
Supplement: s1 [file s1]

## **Supplementary Materials**

### **Materials and Methods (Extended)**

#### Blood sampling

For blood sampling we used the S-Monovette blood collection system (Sarstedt AG & Co.KG, Germany). We used S-Monovette 2,7 ml K3E (REF 05.1167.001) for complete blood count; S-Monovette 7,5 ml Z-Gel (REF 01.1602.001) for biochemical blood tests; and S-Monovette 5 ml 9NC (REF 05.10I 71.001) for coagulation blood tests.

For ROTEM, thrombodynamics and aggregometry we used S-Monovette 5 ml 9NC (REF 05.10I 71.001). For ROTEM and aggregometry we used whole blood, and for thrombodynamics in both modes we used platelet free plasma obtained by two consecutive centrifugations (1600g x 15 min, RT, then plasma transfer to a new 1,5 ml tube following by 1000g x 5 min, RT).

Plasma used in proteomics study was obtained from whole blood in S-Monovette 2,7 ml K3E (REF 05.1167.001) by centrifugation 4000g x 10 min, RT and then aliquoted and frozen at -80 °C.

#### Laboratory and instrumental analysis

A complete blood count (hemoglobin level, red blood cells (RBC), white blood cells (WBC), platelet count, etc.) was performed on Siemens ADVIA 2120i Hematology System with Autoslide (Siemens Healthcare Diagnostics Inc, USA).

Biochemical blood tests (serum creatinine, alanine aminotransferase (ALT), aspartate aminotransferase (AST), etc.) were performed on Siemens ADVIA 2400 Chemistry Analyzer (Siemens Healthcare Diagnostics Inc, USA). Serum creatinine was measured with ADVIA® Chemistry CREA\_2 Creatinine Reagents (REF 3039070); ALT was measured with ADVIA® Chemistry ALT (GPT) Reagents (REF 7501976); AST was measured with ADVIA® Chemistry AST(GOT) Reagents (REF 7499718). All reagents for biochemical blood test were from the ADVIA® trade mark (Siemens Healthcare Diagnostics Inc, USA).

Coagulation blood tests (D-dimer, activated partial thromboplastin time (APTT), prothrombin time (PT), international normalized ratio (INR), antithrombin III (AT-III), Quick prothrombin time test (PT Quick) were performed on ACL TOP 300 CTS (Instrumentation Laboratory, USA). D-dimer was measured with HemosIL D-Dimer HS 500 (REF 00020500100); APTT was measured with HemosIL SynthASil (REF 00020006800); PT was measured with HemosIL RecombiPlasTin 2G (REF 00020003050); AT-III was measured with HemosIL Liquid Antithrombin (REF 00020300400); INR and PT Quick were calculated on ACL TOP 300 CTS (Instrumentation Laboratory, USA). All reagents for coagulation blood tests were from the HemosIL trade mark (Instrumentation Laboratory, USA).

#### Rotational thromboelastometry

Rotational thromboelastometry was performed in NATEM mode on the ROTEM (The Tem Innovations, GmbH, Germany). For measurement in NATEM mode we used ROTEM® star-tem® 20 (REF 503-10-US) (The Tem Innovations, GmbH, Germany).

#### Thrombodynamics

Thrombodynamics was conducted on a Thrombodynamics Analyzer System T-2 (HemaCore LLC, Russia) according to the standard technique. For the thrombodynamic test mode we used

the Thrombodynamics kit (REF K2-02-10) and for the fibrinolysis test mode we used the Thrombodynamics TDL kit (REF TDL-10). All reagents for thrombodynamic and fibrinolysis tests were from the HemaCore trade mark (HemaCore LLC, Russia and HemaCore SA, Switzerland).

### Impedance Aggregometry

A Multiplate® analyzer (Roche Diagnostics International Ltd, Rotkreuz, Switzerland) was used to assess impedance aggregometry. For all tests we used Test Cells (REF 06675590); for arachidonic acid (ASPI) platelet activation we used ASPItest reagent (REF 08847533190), for adenosine diphosphate (ADP) platelet activation we used ADPtest reagent (REF 08847550190), and for thrombin receptor-activated peptide-6 (TRAP-6) platelet activation we used TRAPtest reagent (REF 08847509190). All reagents for impedance aggregometry were the Multiplate® analysis trade mark (Roche Diagnostics International Ltd, Switzerland).

### Targeted blood plasma proteomics

Targeted proteomic analysis was carried out using liquid chromatography-tandem mass spectrometry (LC-MS/MS) with multiple reaction monitoring (MRM). Synthetic stable-isotope labeled internal standard (SIS) and natural (NAT) synthetic proteotypic peptides were used for measuring the corresponding proteins in plasma. The selected 227 SIS and NAT synthetic peptides had been previously validated for use in LC/MRM-MS experiments for blood plasma [12]. The SIS peptide mixture was spiked in each sample at a balanced concentration which was optimized in previous experiments with a dilution series of samples. Standard curves were generated using NAT and SIS peptide standards with bovine serum albumin (BSA) as a surrogate matrix as previously described in detail [11].

Sample preparation was carried out using 10 µL of plasma. Before trypsinolysis, the samples were reduced with 5 mM dithiothreitol (30 min, +37 °C) and alkylated in the dark with 20 mM iodoacetamide (30 min). TPCK Treated trypsin (Worthington, USA) was added in an enzyme:protein ratio of 1:25, hydrolysis was performed at +37°C overnight. The reaction was quenched by adding formic acid (FA) up to 0.5%. The SIS peptide mixture was spiked in each sample followed by desalting by solid-phase extraction using plates (Oasis HLB 96-well Microelution Plate, Waters, USA). The eluate was lyophilized and dissolved in 0.1% FA to a concentration of ~1 mg/mL for further LC-MS/MS analysis.

All samples were analyzed in duplicate by high performance liquid chromatography mass spectrometry (HPLC-MS) using an ExionLC™ UHPLC system coupled online to a SCIEX QTRAP 6500+ triple quadrupole mass spectrometer (SCIEX, Canada). LC-MS parameters, such as the LC gradient and MRM parameters (Q1 and MRM scans) were adapted and optimized based on the previous studies [11,12].

The loaded sample volume was 10 µL per injection. HPLC separation was carried out using Zorbax Eclipse Plus RRHD C18 RP-UHPLC (150 X 2.1 mm i.d., 1.8 µm particles; Agilent Technologies) with gradient elution. Mobile phase A was 0.1% FA in water; mobile phase B was 0.1% FA in acetonitrile. LC separation was performed at a flow rate of 0.4 mL/min using a 53 min gradient from 2 to 45% of mobile phase B. Mass-spectrometric measurements were carried out using the MRM acquisition method. The electrospray ionization (ESI) source settings were as follows: ion spray voltage 4000 V, temperature 450°C, ion source gas 40 L/min. The corresponding transition list for MRM experiments with Q1;Q3 masses for each peptide is available in Table S1.

For quantitative analysis of LC-MS/MS raw data Skyline Quantitative Analysis software (version 20.2.0.343, University of Washington, USA) was used [46,47]. To calculate the protein levels in the measured samples calibration curves were generated using  $1/(X \times X)$ -weighted linear regression methods.

The MRM data quality was checked manually in Skyline for all selected proteins/peptides and includes the absence of interference peaks and the good quality of the peak shape, and the ratios of the precursor and product ion. The exemplary MRM data (from Skyline) for selected proteins are presented in Figures S1-S3.

All experimental results from MRM analysis were uploaded to the PeptideAtlas SRM Experiment Library (PASSEL) and are available via link:

<http://www.peptideatlas.org/PASS/PASS04817> (accessed on 15 March 2023)

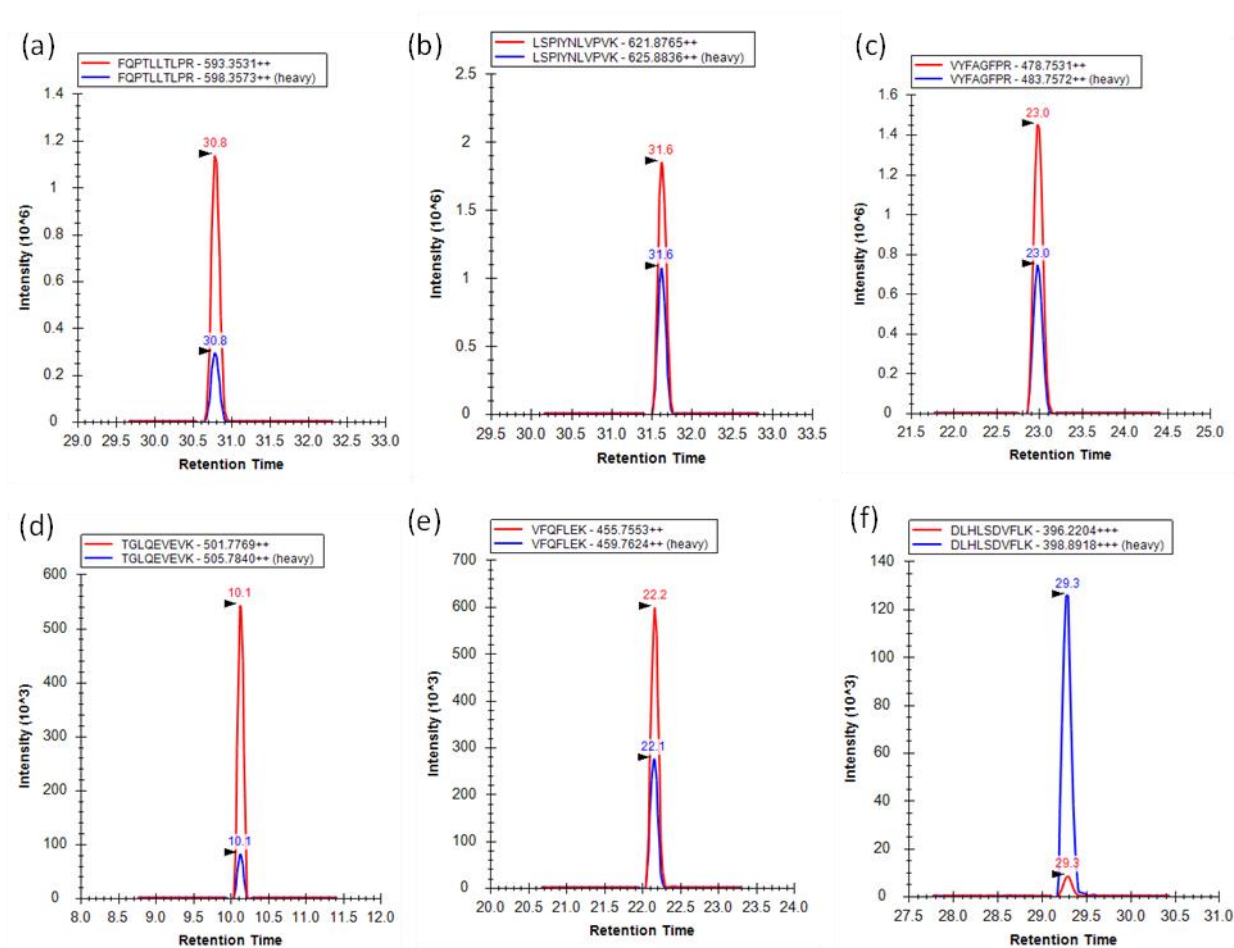

**Figure S1.** The exemplary MRM data (from Skyline) for selected proteins are presented: (a) Plasma protease C1 inhibitor; (b) Complement component C9; (c) Vitamin K-dependent protein S; (d) Complement C3; (e) Complement C5; (f) Complement component C6.

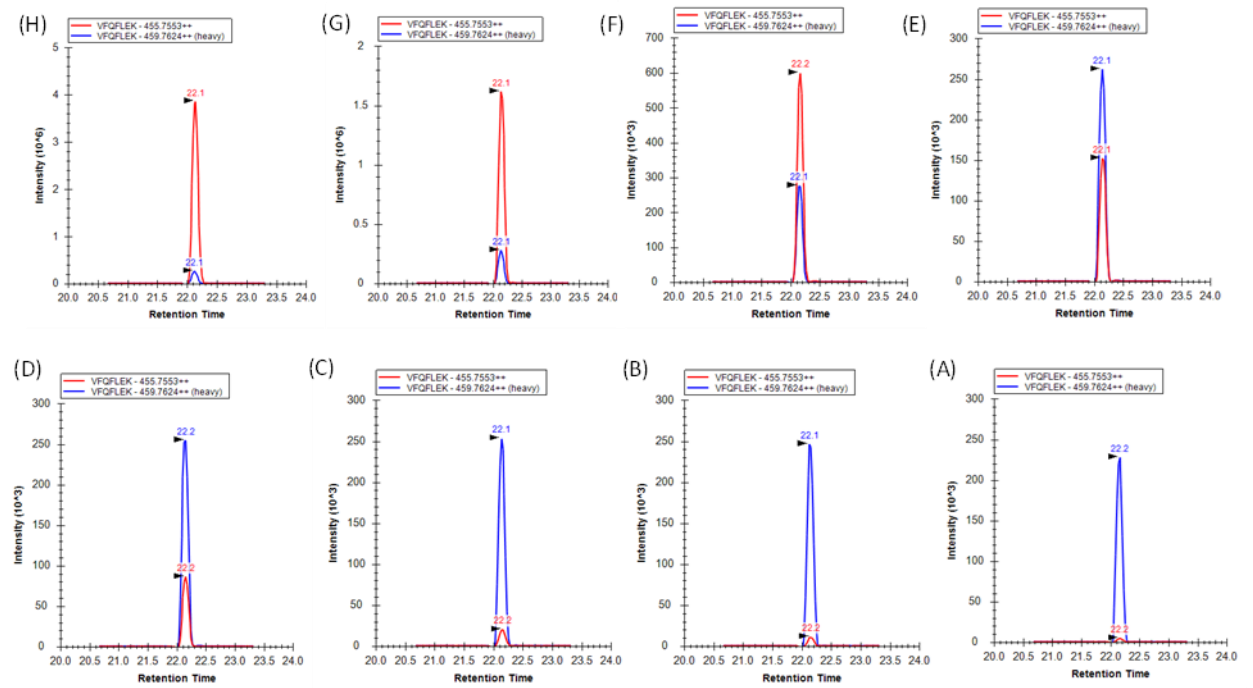

**Figure S2.** The exemplary MRM data (from Skyline) for calibration curve for Complement C5. (A-H) - points on the standard curve.

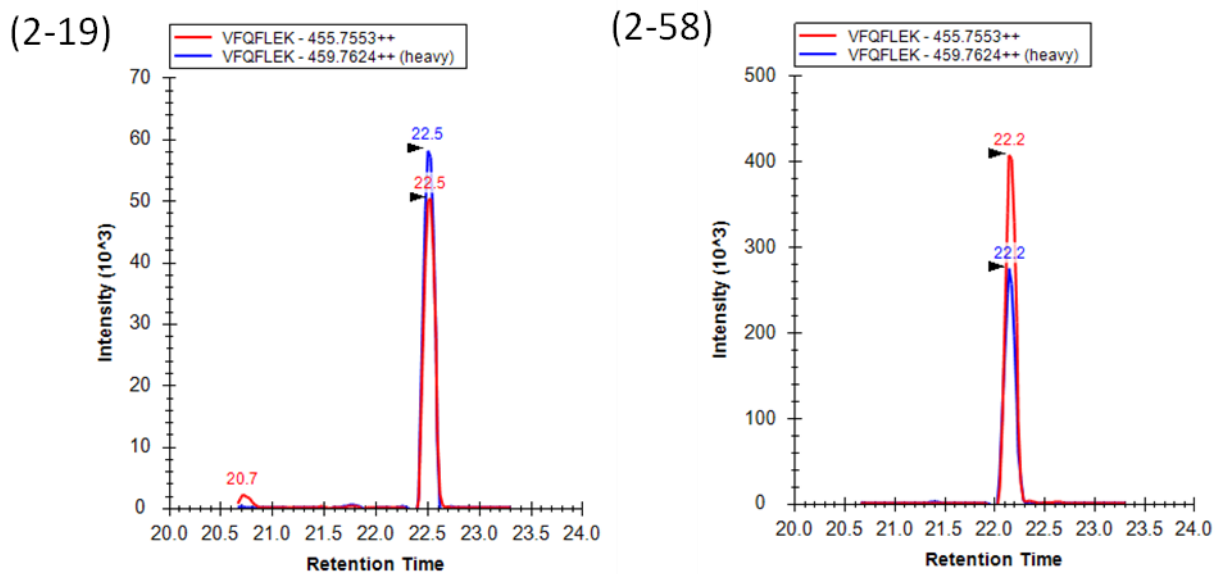

**Figure S3.** The exemplary MRM data (from Skyline) for Complement C5 analysis in blood plasma samples from two selected patients. 2-19, 2-58 - patient codes.

**Table S1.** Transition list for MRM experiments with Q1;Q3 masses for each NAT and SIS peptide.

| Protein name                                                      | Uniprot ID             | Gene name                   | Peptide sequence     | Light         |             | Heavy         |             |
|-------------------------------------------------------------------|------------------------|-----------------------------|----------------------|---------------|-------------|---------------|-------------|
|                                                                   |                        |                             |                      | Precursor m/z | Product m/z | Precursor m/z | Product m/z |
| 60 kDa heat shock protein mitochondrial                           | P10809                 | HSPD1                       | GIIDPTK              | 372.22        | 573.32      | 376.23        | 581.34      |
| 72 kDa type IV collagenase                                        | P08253                 | MMP2                        | IDAVYEAPQEEK         | 696.34        | 993.45      | 700.35        | 1001.47     |
| 78 kDa glucose-regulated protein                                  | P11021                 | HSPA5                       | ITPSYVAFTPEGE<br>R   | 783.89        | 676.83      | 788.90        | 681.83      |
| A disintegrin and metalloproteinase with thrombospondin motifs 2  | O95450                 | ADAMTS2                     | IILLSYGK             | 453.79        | 680.40      | 457.79        | 688.41      |
| A disintegrin and metalloproteinase with thrombospondin motifs 20 | P59510                 | ADAMTS20                    | IPAGATNVDIR          | 563.81        | 288.20      | 568.82        | 298.21      |
| A disintegrin and metalloproteinase with thrombospondin motifs 9  | Q9P2N4                 | ADAMTS9                     | LYNPDVR              | 438.73        | 600.31      | 443.74        | 610.32      |
| Actin, aortic smooth muscle                                       | P62736 P68032 8 others | ACTA2  <br>ACTC1   8 others | SYELPDGQVITI<br>GNER | 895.95        | 380.15      | 900.95        | 380.15      |
| Adhesion G protein-coupled receptor F5                            | Q8IZF2                 | ADGRF5                      | DVIVHPLPLK           | 377.57        | 458.80      | 380.24        | 462.81      |
| Adipocyte plasma membrane-associated protein                      | Q9HDC9                 | APMAP                       | LLEYDTVTR            | 555.30        | 883.42      | 560.30        | 893.42      |
| Adiponectin                                                       | Q15848                 | ADIPOQ                      | IFYNQNNHYDG<br>STGK  | 591.27        | 756.33      | 593.94        | 760.34      |
| ADM                                                               | P35318                 | ADM                         | LDVASEFR             | 468.74        | 538.26      | 473.75        | 548.27      |
| Afamin                                                            | P43652                 | AFM                         | DADPDTFFAK           | 563.76        | 825.41      | 567.76        | 833.43      |
| Alpha-1-acid glycoprotein 1                                       | P02763                 | ORM1                        | NWGLSVYADKP<br>ETTK  | 570.29        | 704.87      | 572.96        | 708.88      |
| Alpha-1-antichymotrypsin                                          | P01011                 | SERPINA3                    | EIGELYLPK            | 531.30        | 244.17      | 535.30        | 252.18      |
| Alpha-1-antitrypsin                                               | P01009                 | SERPINA1                    | SVLGQLGITK           | 508.31        | 415.26      | 512.32        | 419.27      |
| Alpha-1B-glycoprotein_VAR_018369                                  | P04217                 | A1BG                        | LETPDFQLFK           | 619.33        | 243.13      | 623.33        | 243.13      |
| Alpha-2-antiplasmin                                               | P08697                 | SERPINF2                    | LGNQEPGGQTA<br>LK    | 656.85        | 771.44      | 660.85        | 779.45      |
| Alpha-2-HS-glycoprotein                                           | P02765                 | AHSG                        | FSVVYAK              | 407.23        | 579.35      | 411.24        | 587.36      |
| Alpha-2-macroglobulin                                             | P01023                 | A2M                         | AIGYLNTGYQR          | 628.33        | 851.44      | 633.33        | 861.45      |
| Angiogenin                                                        | P03950                 | ANG                         | DINTFIHGK            | 386.87        | 465.74      | 389.54        | 469.75      |
| Angiopoietin-related protein 3                                    | Q9Y5C1                 | ANGPTL3                     | DLVFSTWDHK           | 416.54        | 510.25      | 419.21        | 514.26      |
| Angiotensinogen                                                   | P01019                 | AGT                         | ALQDQLVLVAA<br>K     | 634.88        | 542.82      | 638.89        | 546.83      |
| Antithrombin-III                                                  | P01008                 | SERPINC1                    | DDLTVSDFHFK          | 437.21        | 483.74      | 439.88        | 487.74      |
| Apolipoprotein A-I                                                | P02647                 | APOA1                       | ATEHLSTLSEK          | 405.88        | 572.80      | 408.55        | 576.80      |
| Apolipoprotein A-II                                               | P02652                 | APOA2                       | SPELQAEAK            | 486.75        | 443.24      | 490.76        | 447.24      |
| Apolipoprotein A-IV                                               | P06727                 | APOA4                       | LGEVNTYAGDL<br>QK    | 704.36        | 300.16      | 708.37        | 300.16      |
| Apolipoprotein B-100                                              | P04114                 | APOB                        | FPEVDVLTK            | 524.29        | 450.76      | 528.30        | 454.76      |
| Apolipoprotein C-I                                                | P02654                 | APOC1                       | EWFSETFQK            | 601.28        | 886.43      | 605.29        | 894.44      |

|                                                 |        |         |                      |        |        |        |        |
|-------------------------------------------------|--------|---------|----------------------|--------|--------|--------|--------|
| Apolipoprotein C-II                             | P02655 | APOC2   | TYLPAVDEK            | 518.27 | 265.12 | 522.28 | 265.12 |
| Apolipoprotein C-III                            | P02656 | APOC3   | GWVTDGFSSLK          | 598.80 | 244.11 | 602.81 | 244.11 |
| Apolipoprotein C-IV                             | P55056 | APOC4   | ELLETVVNR            | 536.80 | 717.39 | 541.81 | 727.40 |
| Apolipoprotein D                                | P05090 | APOD    | NILTSNNIDVK          | 615.84 | 228.13 | 619.85 | 228.13 |
| Apolipoprotein E                                | P02649 | APOE    | LGPLVEQGR            | 484.78 | 399.73 | 489.78 | 404.73 |
| Apolipoprotein F                                | Q13790 | APOF    | SGVQQLIQYYQ<br>DQK   | 566.62 | 613.33 | 569.29 | 613.33 |
| Apolipoprotein L1                               | O14791 | APOL1   | VAQELEEK             | 473.25 | 775.38 | 477.26 | 783.40 |
| Apolipoprotein M                                | O95445 | APOM    | AFLLTPR              | 409.25 | 599.39 | 414.25 | 609.40 |
| Apolipoprotein(a)                               | P08519 | LPA     | GTYSTTVTGR           | 521.76 | 721.38 | 526.77 | 731.39 |
| Aromatase                                       | P11511 | CYP19A1 | NMLEMIFTPR           | 626.31 | 893.45 | 631.32 | 903.46 |
| Atrial natriuretic peptide receptor 1           | P16066 | NPR1    | ITDYGLESFR           | 600.80 | 986.46 | 605.80 | 996.47 |
| Attractin                                       | O75882 | ATRN    | SVNNVVVR             | 443.76 | 700.41 | 448.76 | 710.42 |
| Autism susceptibility gene 2 protein            | Q8WXX7 | AUTS2   | ALSLASSGSDK          | 561.79 | 738.33 | 565.79 | 746.34 |
| B-cell scaffold protein with ankyrin repeats    | Q8NDB2 | BANK1   | LTIVHHPGGK           | 353.54 | 316.67 | 356.21 | 320.67 |
| Beta-2-glycoprotein 1                           | P02749 | APOH    | ATVVYQGER            | 511.77 | 751.37 | 516.77 | 761.38 |
| Beta-2-microglobulin                            | P61769 | B2M     | VNHVTLSPK            | 374.88 | 459.26 | 377.55 | 467.27 |
| Beta-Ala-His dipeptidase                        | Q96KN2 | CNDP1   | ALEQDLPVNIK          | 620.35 | 570.36 | 624.36 | 578.38 |
| Beta-nerve growth factor                        | P01138 | NGF     | TTATDIK              | 375.21 | 547.31 | 379.21 | 555.32 |
| Biotinidase                                     | P43251 | BTD     | SHLIIAQVAK           | 360.56 | 451.27 | 363.23 | 451.27 |
| C4b-binding protein alpha chain                 | P04003 | C4BPA   | EDVYVVGTVLR          | 625.34 | 545.34 | 630.35 | 555.35 |
| Cadherin-13                                     | P55290 | CDH13   | INENTGSVSVTR         | 638.83 | 228.13 | 643.83 | 228.13 |
| Cadherin-5                                      | P33151 | CDH5    | ELDSTGTPTGK          | 553.27 | 863.41 | 557.28 | 871.42 |
| Calcitonin gene-related peptide 1               | P06881 | CALCA   | NNFVPTNVGSK          | 588.80 | 702.38 | 592.81 | 710.39 |
| Calcitonin                                      | P01258 | CALCA   | FHTFPQTAIGVG<br>APGK | 543.29 | 585.34 | 545.96 | 593.35 |
| Calponin-1                                      | P51911 | CNN1    | VNVGVK               | 308.19 | 516.31 | 312.20 | 524.33 |
| Carbonic anhydrase 1                            | P00915 | CA1     | VLDALQAIK            | 485.80 | 758.44 | 489.81 | 766.45 |
| Carboxypeptidase B2                             | Q96IY4 | CPB2    | IAWHVIR              | 298.85 | 262.67 | 302.18 | 267.67 |
| Carboxypeptidase N catalytic chain              | P15169 | CPN1    | SIPQVSPVR            | 491.79 | 391.73 | 496.79 | 396.73 |
| Carboxypeptidase N subunit 2                    | P22792 | CPN2    | AGGSWDLAVQE<br>R     | 644.82 | 830.44 | 649.82 | 840.44 |
| Cartilage acidic protein 1                      | Q9NQ79 | CRTAC1  | GVASLFAGR            | 439.25 | 721.40 | 444.25 | 731.41 |
| Cathelicidin antimicrobial peptide              | P49913 | CAMP    | AIDGINQR             | 443.74 | 702.35 | 448.74 | 712.36 |
| Cation-independent mannose-6-phosphate receptor | P11717 | IGF2R   | GHQAFDVGQPR          | 404.54 | 457.25 | 407.87 | 467.26 |
| CD40 ligand                                     | P29965 | CD40LG  | SQFEGFVK             | 471.24 | 726.38 | 475.25 | 734.40 |
| CD44 antigen                                    | P16070 | CD44    | YGFIEGHVVIPR         | 462.92 | 612.35 | 466.26 | 617.35 |
| CD5 antigen-like                                | O43866 | CD5L    | LVGGLHR              | 376.23 | 213.16 | 381.24 | 213.16 |
| Gelsolin                                        | P06396 | GSN     | EGGQTAPASTR          | 537.76 | 531.29 | 542.77 | 541.30 |
| Ceruloplasmin                                   | P00450 | CP      | IYHSHIDAPK           | 394.21 | 452.74 | 396.88 | 456.74 |

|                                          |               |           |                     |        |        |        |        |
|------------------------------------------|---------------|-----------|---------------------|--------|--------|--------|--------|
| Cholesteryl ester transfer protein       | P11597        | CETP      | GVSLFDIINPEIT<br>R  | 843.97 | 842.47 | 848.98 | 852.48 |
| Cholinesterase                           | P06276        | BCHE      | YLTLNTESTR          | 599.31 | 921.46 | 604.31 | 931.47 |
| Chromogranin-A                           | P10645        | CHGA      | ELQDLALQGAK         | 593.33 | 815.46 | 597.33 | 823.48 |
| Claudin-5                                | O00501        | CLDN5     | PDLSFPVK            | 451.75 | 805.45 | 455.76 | 813.46 |
| Clusterin                                | P10909        | CLU       | ELDESLQVAER         | 644.82 | 375.20 | 649.83 | 385.21 |
| Coagulation factor IX                    | P00740        | F9        | SALVLQYLR           | 531.82 | 692.41 | 536.82 | 702.42 |
| Coagulation factor V                     | P12259        | F5        | AEVDDVIQVR          | 572.30 | 844.45 | 577.31 | 854.46 |
| Coagulation factor VII                   | P08709        | F7        | VSQYIEWLQK          | 647.35 | 979.52 | 651.35 | 987.54 |
| Coagulation factor VIII                  | P00451        | F8        | LHPTHYSIR           | 375.21 | 437.23 | 378.54 | 442.24 |
| Coagulation factor X                     | P00742        | F10       | MLEVPYVDR           | 561.29 | 649.33 | 566.29 | 659.34 |
| Coagulation factor XI                    | P03951        | F11       | TSESGLPSTR          | 517.76 | 460.25 | 522.76 | 470.26 |
| Coagulation factor XII                   | P00748        | F12       | EQPPSLTR            | 464.25 | 335.70 | 469.25 | 340.70 |
| Coagulation factor XIII A chain          | P00488        | F13A1     | GTYPVPIVSELQ<br>SGK | 844.47 | 435.22 | 848.47 | 435.22 |
| Coagulation factor XIII B chain          | P05160        | F13B      | IQTHSTTYR           | 369.52 | 627.31 | 372.86 | 637.32 |
| Collagen alpha-1(I) chain                | P02452        | COL1A1    | GVVGLPGQR           | 441.76 | 457.25 | 446.77 | 467.26 |
| Collagen alpha-1(III) chain              | P02461        | COL3A1    | GGAGPPGPEGG<br>K    | 490.74 | 369.69 | 494.75 | 373.70 |
| Collagen alpha-1(XVIII) chain            | P39060        | COL18A1   | AVGLAGTFR           | 446.26 | 721.40 | 451.26 | 731.41 |
| Collagen alpha-2(I) chain                | P08123        | COL1A2    | GVVGPQGAR           | 420.74 | 342.69 | 425.74 | 347.70 |
| Complement C1q subcomponent subunit A    | P02745        | C1QA      | PAFSAIR             | 381.22 | 593.34 | 386.22 | 603.35 |
| Complement C1q subcomponent subunit B    | P02746        | C1QB      | IAFSATR             | 383.22 | 581.30 | 388.22 | 591.31 |
| Complement C1q subcomponent subunit C    | P02747        | C1QC      | FQSVFTVTR           | 542.79 | 809.45 | 547.80 | 819.46 |
| Complement C1r subcomponent              | P00736        | C1R       | GLTLHLK             | 261.17 | 306.20 | 263.84 | 310.20 |
| Complement C1r subcomponent-like protein | Q9NZP8        | C1RL      | VVVHPDYR            | 328.85 | 443.23 | 332.18 | 448.24 |
| Complement C1s subcomponent              | P09871        | C1S       | TNFDNDIALVR         | 639.33 | 216.10 | 644.33 | 216.10 |
| Complement C2                            | P06681        | C2        | HAFILQDTK           | 536.79 | 864.48 | 540.80 | 872.50 |
| Complement C3                            | P01024        | C3        | TGLQEVEVK           | 501.78 | 731.39 | 505.78 | 739.41 |
| Complement C4                            | P0C0L4 P0C0L5 | C4A   C4B | VGDTLNLNLR          | 557.81 | 629.37 | 562.82 | 639.38 |
| Complement C5                            | P01031        | C5        | VFQFLEK             | 455.76 | 664.37 | 459.76 | 672.38 |
| Complement C6                            | P13671        | C6        | DLHLSDVFLK          | 396.22 | 411.24 | 398.89 | 415.25 |
| Complement C7                            | P10643        | C7        | AASGTQNNVLR         | 565.80 | 494.76 | 570.80 | 499.77 |
| Complement C8 alpha chain                | P07357        | C8A       | MESLGITSR           | 497.26 | 733.42 | 502.26 | 743.43 |
| Complement C8 beta chain                 | P07358        | C8B       | SDLEVAHYK           | 354.51 | 430.24 | 357.18 | 434.24 |
| Complement C9                            | P02748        | C9        | LSPIYNLVPVK         | 621.88 | 521.82 | 625.88 | 525.83 |
| Complement factor B                      | P00751        | CFB       | EELLPAQDIK          | 578.32 | 671.37 | 582.32 | 679.39 |
| Complement factor D                      | P00746        | CFD       | THHDGAITER          | 379.52 | 405.21 | 382.86 | 415.22 |

|                                                          |               |                 |                        |        |        |        |        |
|----------------------------------------------------------|---------------|-----------------|------------------------|--------|--------|--------|--------|
| Complement factor H                                      | P08603        | CFH             | SSQESYAHGTK            | 398.85 | 510.74 | 401.52 | 514.75 |
| Complement factor I                                      | P05156        | CFI             | VFSLQWGEVK             | 596.82 | 946.50 | 600.83 | 954.51 |
| Corticosteroid-binding globulin                          | P08185        | SERPINA6        | WSAGLTSSQVD<br>LYIPK   | 882.96 | 244.17 | 886.97 | 252.18 |
| C-reactive protein                                       | P02741        | CRP             | AFVFPK                 | 354.71 | 244.17 | 358.71 | 252.18 |
| Creatine kinase B-type                                   | P12277        | CKB             | DLFDPIIEDR             | 616.81 | 742.41 | 621.82 | 752.42 |
| Creatine kinase M-type                                   | P06732        | CKM             | FEEILTR                | 454.25 | 631.38 | 459.25 | 641.39 |
| Cystatin-C                                               | P01034        | CST3            | ALDFAVGEYNK            | 613.81 | 300.16 | 617.81 | 300.16 |
| Desmoplakin                                              | P15924        | DSP             | AELIVQPELK             | 570.34 | 486.29 | 574.34 | 494.31 |
| Dickkopf-related protein 1 and 2                         | O94907 Q9UBU2 | DKK1  <br>DKK2  | GSHGLEIFQR             | 381.87 | 450.25 | 385.20 | 460.25 |
| Di-N-acetylchitobiase                                    | Q01459        | CTBS            | ATYIQNYR               | 514.76 | 428.72 | 519.77 | 433.72 |
| Elastin                                                  | P15502        | ELN             | LPGGYGLPYTTG<br>K      | 662.35 | 605.81 | 666.36 | 609.82 |
| Endothelial lipase                                       | Q9Y5X9        | LIPG            | LVSALHTR               | 299.52 | 342.69 | 302.85 | 347.70 |
| Endothelial protein C receptor                           | Q9UNN8        | PROCR           | TLAFPLTIR              | 516.32 | 817.49 | 521.32 | 827.50 |
| Epidermal growth factor receptor                         | P00533        | EGFR            | IPLNLQIIR              | 604.87 | 548.33 | 609.88 | 553.33 |
| E-selectin                                               | P16581        | SELE            | YTHLVAIQNK             | 396.22 | 402.18 | 398.90 | 402.18 |
| Extracellular matrix protein 1                           | Q16610        | ECM1            | NVALVSGDTEN<br>AK      | 659.34 | 821.36 | 663.34 | 829.38 |
| Fatty acid-binding protein heart                         | P05413        | FABP3           | SLGVGFATR              | 454.25 | 707.38 | 459.26 | 717.39 |
| Ferritin heavy chain                                     | P02794        | FTH1            | NVNQSLLELHK            | 432.24 | 541.30 | 434.91 | 545.31 |
| Ferritin light chain                                     | P02792        | FTL             | LGGPEAGLGEY<br>LFER    | 804.41 | 913.44 | 809.41 | 923.45 |
| Fetuin-B                                                 | Q9UGM5        | FETUB           | LVVLPFPK               | 456.80 | 700.44 | 460.81 | 708.45 |
| Fibrinogen alpha chain                                   | P02671        | FGA             | VQHIQLLQK              | 553.84 | 228.13 | 557.84 | 228.13 |
| Fibrinogen beta chain                                    | P02675        | FGB             | HQLYIDETVNSN<br>IPTNLR | 709.70 | 764.38 | 713.04 | 764.38 |
| Fibrinogen gamma chain                                   | P02679        | FGG             | YEASILTHDSSIR          | 497.92 | 600.32 | 501.26 | 605.33 |
| Fibronectin                                              | P02751        | FN1             | HTSVQTTSSGSG<br>PFTDVR | 621.97 | 734.38 | 625.30 | 744.39 |
| Fibulin-1                                                | P23142        | FBLN1           | TGYYFDGISR             | 589.78 | 857.42 | 594.78 | 867.42 |
| Ficolin-2                                                | Q15485        | FCN2            | GTHGSFANGIN<br>WK      | 463.56 | 447.24 | 466.23 | 455.25 |
| Ficolin-3                                                | O75636        | FCN3            | YAVSEAAAHK             | 349.51 | 357.18 | 352.19 | 361.19 |
| Follistatin-related protein 1   Early endosome antigen 1 | Q12841 Q15075 | FSTL1  <br>EEA2 | YVQELQK                | 454.25 | 645.36 | 458.25 | 653.37 |
| Fructose-bisphosphate aldolase B                         | P05062        | ALDOB           | ALQASALAAWG<br>GK      | 622.34 | 530.28 | 626.35 | 534.29 |
| Galectin-3                                               | P17931        | LGALS3          | IALDFQR                | 431.74 | 678.36 | 436.75 | 688.37 |
| Galectin-3-binding protein                               | Q08380        | LGALS3BP        | SDLAVPSELALL<br>K      | 678.39 | 870.53 | 682.40 | 878.54 |
| Gamma-enolase                                            | P09104        | ENO2            | YITGDQLGALY<br>QDFVR   | 620.32 | 827.40 | 623.65 | 837.41 |

|                                                                           |               |          |                         |        |         |        |         |
|---------------------------------------------------------------------------|---------------|----------|-------------------------|--------|---------|--------|---------|
| Gelsolin                                                                  | P06396        | GSN      | AGALNSNDAFV<br>LK       | 660.35 | 200.10  | 664.36 | 200.10  |
| Glial fibrillary acidic protein                                           | P14136        | GFAP     | LADVYQAE LR             | 589.31 | 300.16  | 594.32 | 300.16  |
| Glutamate receptor ionotropic NMDA<br>2A                                  | Q12879        | GRIN2A   | FSYIPEAK                | 477.75 | 444.25  | 481.76 | 452.26  |
| Glutamate receptor ionotropic NMDA<br>2B                                  | Q13224        | GRIN2B   | EPGGPSFTIGK             | 545.28 | 204.13  | 549.29 | 212.15  |
| Glutathione peroxidase 3                                                  | P22352        | GPX3     | QEPGENSEILPTL<br>K      | 777.90 | 649.35  | 781.91 | 653.36  |
| Glutathione S-transferase P                                               | P09211        | GSTP1    | TLGLYGK                 | 376.22 | 537.30  | 380.23 | 545.32  |
| Haptoglobin                                                               | P00738        | HP       | DIAPTLTLTYVGK           | 645.87 | 496.29  | 649.88 | 500.30  |
| Heat shock protein beta-1                                                 | P04792        | HSPB1    | LFDQAFGLPR              | 582.31 | 903.47  | 587.32 | 913.48  |
| Hemoglobin subunit alpha                                                  | P69905        | HBA1;    | VGAHAGEYGA E<br>ALER    | 510.58 | 488.28  | 513.92 | 498.29  |
| Hemopexin                                                                 | P02790        | HPX      | NFPSPVDAAFR             | 610.81 | 480.25  | 615.81 | 485.26  |
| Heparin cofactor 2                                                        | P05546        | SERPIND1 | TLEAQLTPR               | 514.79 | 814.44  | 519.79 | 824.45  |
| Hepatocyte growth factor-like protein                                     | P26927        | MST1     | SPLNDFQVLR              | 594.82 | 891.47  | 599.83 | 901.48  |
| Histidine-rich glycoprotein                                               | P04196        | HRG      | ADLFYDVEALD<br>LESPK    | 912.95 | 331.20  | 916.96 | 339.21  |
| Hornerin                                                                  | Q86YZ3        | HRNR     | GSGSGQSPSSGQ<br>HGTGFGR | 583.26 | 730.34  | 586.60 | 735.34  |
| Hyaluronan-binding protein 2                                              | Q14520        | HABP2    | VVLGDQDLK               | 493.78 | 788.41  | 497.79 | 796.43  |
| Ig gamma-1 chain C region                                                 | P01857        | IGHG1    | GPSVFPLAPSSK            | 593.83 | 846.47  | 597.83 | 854.49  |
| Ig mu chain C region                                                      | P01871        | IGHM     | GFPSVLR                 | 388.23 | 286.18  | 393.23 | 291.19  |
| Ig mu heavy chain disease protein and<br>Ig mu chain C                    | P04220 P01871 | IGHM     | VSVFVPPR                | 450.77 | 615.36  | 455.77 | 625.37  |
| IgGfC-binding protein                                                     | Q9Y6R7        | FCGBP    | GATTSPGVYELS<br>SR      | 712.85 | 1007.52 | 717.86 | 1017.52 |
| Immunoglobulin kappa variable 4-1                                         | P06312        | IGKV4-1  | NYLAWYQQKPG<br>QPPK     | 606.65 | 770.92  | 609.32 | 774.92  |
| Insulin-like growth factor I                                              | P05019        | IGF1     | GFYFNKPTGYGS<br>SSR     | 556.60 | 732.35  | 559.93 | 737.35  |
| Insulin-like growth factor-binding<br>protein 1                           | P08833        | IGFBP1   | ALPGEQQPLHAL<br>TR      | 510.95 | 597.35  | 514.29 | 607.35  |
| Insulin-like growth factor-binding<br>protein 2                           | P18065        | IGFBP2   | LIQGAPTIR               | 484.80 | 614.36  | 489.80 | 624.37  |
| Insulin-like growth factor-binding<br>protein 3                           | P17936        | IGFBP3   | FLNVLSPR                | 473.28 | 685.40  | 478.28 | 695.41  |
| Insulin-like growth factor-binding<br>protein complex acid labile subunit | P35858        | IGFALS   | LAELPADALGPL<br>QR      | 732.41 | 1037.57 | 737.42 | 1047.58 |
| Inter-alpha-trypsin inhibitor heavy chain<br>H1                           | P19827        | ITIH1    | GSLVQASEANL<br>QAAQDFVR | 668.68 | 806.42  | 672.01 | 816.42  |
| Inter-alpha-trypsin inhibitor heavy chain<br>H2                           | P19823        | ITIH2    | SLAPTAAAK               | 415.24 | 558.32  | 419.25 | 566.34  |
| Inter-alpha-trypsin inhibitor heavy chain<br>H4                           | Q14624        | ITIH4    | SPEQQETVLDGN<br>LIIR    | 604.65 | 685.44  | 607.99 | 695.44  |

|                                                     |                           |          |                         |        |        |        |        |
|-----------------------------------------------------|---------------------------|----------|-------------------------|--------|--------|--------|--------|
| Intercellular adhesion molecule 1                   | P05362                    | ICAM1    | LLGIETPLPK              | 540.84 | 854.50 | 544.84 | 862.51 |
| Interleukin-10                                      | P22301                    | IL10     | AHVNSLGENLK             | 394.55 | 560.30 | 397.22 | 568.32 |
| Interleukin-6                                       | P05231                    | IL6      | FESSEEQAR               | 541.74 | 806.36 | 546.75 | 816.37 |
| Interstitial collagenase                            | P03956                    | MMP1     | AFQLWSNVTPL<br>TFTK     | 876.97 | 347.17 | 880.98 | 347.17 |
| Kallistatin                                         | P29622                    | SERPINA4 | VGSALFLSHNLK            | 429.25 | 593.83 | 431.92 | 597.84 |
| Keratin type I cytoskeletal 10                      | P13645                    | KRT10    | SLLEGEGSSGGG<br>GR      | 631.80 | 201.12 | 636.81 | 201.12 |
| Keratin type I cytoskeletal 9                       | P35527                    | KRT9     | TLLDIDNTR               | 530.79 | 846.43 | 535.79 | 856.44 |
| Keratin-type II cytoskeletal 2 epidermal            | P35908                    | KRT2     | YEELQVTVGR              | 597.31 | 293.11 | 602.32 | 293.11 |
| Kininogen-1                                         | P01042                    | KNG1     | DIPTNSPELEETL<br>THTITK | 713.70 | 637.66 | 716.37 | 640.33 |
| Lactotransferrin                                    | P02788                    | LTF      | YLGPQYVAGITN<br>LK      | 768.92 | 602.34 | 772.93 | 606.35 |
| Leucine-rich alpha-2-glycoprotein                   | P02750                    | LRG1     | DLLLQPDLR               | 590.34 | 725.39 | 595.34 | 735.40 |
| Lipopolysaccharide-binding protein                  | P18428                    | LBP      | ITLPDFTGDLR             | 624.34 | 920.45 | 629.34 | 930.46 |
| L-selectin                                          | P14151                    | SELL     | AEIEYLEK                | 497.76 | 552.30 | 501.77 | 560.32 |
| Lumican                                             | P51884                    | LUM      | SLEDLQLTHNK             | 433.23 | 549.28 | 435.90 | 553.29 |
| Lysozyme C                                          | P61626                    | LYZ      | AWVAWR                  | 394.71 | 531.30 | 399.72 | 541.31 |
| Mannan-binding lectin serine protease 1             | P48740                    | MASP1    | TGVITSPDFPNP<br>YPK     | 816.92 | 258.14 | 820.92 | 258.14 |
| Mannan-binding lectin serine protease 2A            | O00187                    | MASP2    | WPEPVFGR                | 494.26 | 575.33 | 499.26 | 585.34 |
| Mannose-binding protein C                           | P11226                    | MBL2     | WLTFSLGK                | 476.27 | 652.37 | 480.28 | 660.38 |
| Matrix Gla protein                                  | P08493                    | MGP      | NANTFISPQQR             | 638.33 | 728.40 | 643.33 | 738.41 |
| Matrix metalloproteinase-9                          | P14780                    | MMP9     | AVIDDAFAR               | 489.26 | 807.40 | 494.26 | 817.41 |
| Melanotransferrin                                   | P08582                    | MELTF    | YYDYSGAFR               | 571.25 | 815.37 | 576.26 | 825.38 |
| Metalloproteinase inhibitor 1                       | P01033                    | TIMP1    | GFQALGDAADI<br>R        | 617.31 | 517.28 | 622.32 | 517.28 |
| Metalloproteinase inhibitor 2                       | P16035                    | TIMP2    | EYLIAGK                 | 397.23 | 275.17 | 401.23 | 283.19 |
| Metalloproteinase inhibitor 4                       | Q99727                    | TIMP4    | VVPASADPADT<br>EK       | 650.32 | 551.26 | 654.33 | 555.26 |
| Microtubule-associated protein tau                  | P10636                    | MAPT     | EADLPEPSEK              | 557.77 | 686.34 | 561.77 | 694.35 |
| Mucin-16                                            | Q8WXI7                    | MUC16    | ELGPYTLDR               | 532.27 | 504.28 | 537.28 | 514.29 |
| Myelin basic protein                                | P02686 (not in isoform 2) |          | GVDAQGTLISK             | 488.26 | 819.42 | 492.27 | 827.43 |
| Myeloblastin                                        | P24158                    | PRTN3    | LVNVVLGAHNV<br>R        | 430.93 | 539.81 | 434.26 | 544.81 |
| Myeloperoxidase                                     | P05164                    | MPO      | VFFASWR                 | 456.74 | 666.34 | 461.74 | 676.34 |
| N(G),N(G)-dimethylarginine dimethylaminohydrolase 1 | O94760                    | DDAH1    | TPEEYPESAK              | 575.77 | 525.24 | 579.77 | 529.25 |
| N-acetylmuramoyl-L-alanine amidase                  | Q96PD5                    | PGLYRP2  | AGLLRPDYALL<br>GHR      | 517.96 | 482.28 | 521.30 | 492.29 |
| Natriuretic peptides B                              | P16860                    | NPPB     | EVATEGIR                | 437.74 | 646.35 | 442.74 | 656.36 |

|                                                      |        |           |                  |        |         |        |         |
|------------------------------------------------------|--------|-----------|------------------|--------|---------|--------|---------|
| Neuropilin-2                                         | O60462 | NRP2      | ALQVVR           | 343.22 | 501.31  | 348.23 | 511.32  |
| Neutrophil gelatinase-associated lipocalin           | P80188 | LCN2      | ITLYGR           | 361.71 | 508.29  | 366.72 | 518.30  |
| Nucleoside diphosphate kinase A, B                   | P15531 | NME1      | PFFAGLVK         | 439.76 | 634.39  | 443.77 | 642.41  |
| Occludin                                             | Q16625 | OCLN      | SLQSELDEINK      | 638.32 | 947.47  | 642.33 | 955.48  |
| Osteopontin                                          | P10451 | SPP1      | GDSVVYGLR        | 483.26 | 607.36  | 488.26 | 617.36  |
| Oxidized low-density lipoprotein receptor 1          | P78380 | OLR1      | LEGQISAR         | 437.24 | 631.35  | 442.25 | 641.36  |
| Pappalysin-1                                         | Q13219 | PAPPA     | AYLDVNELK        | 532.78 | 235.11  | 536.79 | 235.11  |
| Peroxiredoxin-1                                      | Q06830 | PRDX1     | ADEGISFR         | 447.72 | 409.22  | 452.72 | 419.23  |
| Peroxiredoxin-2                                      | P32119 | PRDX2     | GLFIIDGK         | 431.76 | 692.40  | 435.76 | 700.41  |
| Phosphatidylcholine-sterol acyltransferase           | P04180 | LCAT      | SSGLVSNAPGVQIR   | 692.88 | 669.40  | 697.88 | 679.41  |
| Phosphatidylinositol-glycan-specific phospholipase D | P80108 | GPLD1     | FGSSLITVR        | 490.28 | 488.32  | 495.29 | 498.33  |
| Phospholipid transfer protein                        | P55058 | PLTP      | AVEPQLQEEER      | 664.33 | 514.75  | 669.33 | 519.76  |
| Pigment epithelium-derived factor                    | P36955 | SERPINF1  | LQSLFDSPDFSK     | 692.34 | 1142.54 | 696.35 | 1150.55 |
| Plasma protease C1 inhibitor                         | P05155 | SERPING1  | FQPTLLTLPR       | 593.35 | 910.57  | 598.36 | 920.58  |
| Plasma serine protease inhibitor                     | P05154 | SERPINA5  | GFQQLLQELNQPR    | 524.28 | 514.27  | 527.62 | 524.28  |
| Plasminogen activator inhibitor 1                    | P05121 | SERPINE1  | VFQQVAQASK       | 553.30 | 504.28  | 557.31 | 512.29  |
| Plasminogen                                          | P00747 | PLG       | EAQLPVIENK       | 570.82 | 699.40  | 574.82 | 707.42  |
| Plastin-2                                            | P13796 | LCP1      | ISFDEFIK         | 499.76 | 798.40  | 503.77 | 806.42  |
| Platelet endothelial cell adhesion molecule          | P16284 | PECAM1    | SELVTVTESFSTPK   | 762.89 | 217.08  | 766.90 | 217.08  |
| Platelet glycoprotein VI                             | Q9HCN6 | GP6       | EGDPAPYK         | 438.71 | 407.23  | 442.72 | 415.24  |
| Platelet-activating factor acetylhydrolase           | Q13093 | PLA2G7    | GSVHQNFADFTFATGK | 576.28 | 886.43  | 578.95 | 894.44  |
| Pregnancy zone protein                               | P20742 | PZP       | ISEITNIVSK       | 552.32 | 774.47  | 556.33 | 782.49  |
| Proenkephalin-A                                      | P01210 | PENK      | ELLETGDNR        | 523.76 | 562.26  | 528.76 | 572.27  |
| Prolactin                                            | P01236 | PRL       | IDNYLK           | 383.21 | 652.33  | 387.22 | 660.34  |
| Protein AMBP                                         | P02760 | AMBP      | HHGPTITAK        | 321.18 | 275.13  | 323.85 | 275.13  |
| Protein S100-A12                                     | P80511 | S100A12   | GHFDTLSK         | 302.16 | 234.14  | 304.83 | 242.16  |
| Protein S100-A9                                      | P06702 | S100A9    | DLQNFLK          | 439.24 | 649.37  | 443.25 | 657.38  |
| Protein S100-B                                       | P04271 | S100B     | EQEVVDK          | 423.71 | 460.28  | 427.72 | 468.29  |
| Protein Z-dependent protease inhibitor               | Q9UK55 | SERPINA10 | ETSNFGFSLLR      | 635.82 | 692.41  | 640.83 | 702.42  |
| Protein_deglycase_DJ-1                               | Q99497 | PARK7     | ALVILAK          | 364.26 | 543.39  | 368.26 | 551.40  |
| Proteoglycan 4                                       | Q92954 | PRG4      | DQYYNIDVPSR      | 685.32 | 244.09  | 690.33 | 244.09  |
| Prothrombin                                          | P00734 | F2        | ELLESYIDGR       | 597.80 | 710.35  | 602.81 | 720.36  |
| P-selectin                                           | P16109 | SELP      | TWTWVGTK         | 489.76 | 691.38  | 493.76 | 699.39  |
| Ras GTPase-activating protein nGAP                   | Q9UJF2 | RASAL2    | ETQSTPQSAPQVR    | 714.86 | 882.48  | 719.86 | 892.49  |
| Resistin                                             | Q9HD89 | RETN      | IQEVAGSLIFR      | 616.85 | 242.15  | 621.86 | 242.15  |

|                                                      |                           |             |                      |        |        |        |        |
|------------------------------------------------------|---------------------------|-------------|----------------------|--------|--------|--------|--------|
| Retinol-binding protein 4                            | P02753                    | RBP4        | YWGVASFLQK           | 599.82 | 849.48 | 603.82 | 857.50 |
| Serotransferrin                                      | P02787                    | TF          | DGAGDVAFVK           | 489.75 | 735.40 | 493.76 | 743.42 |
| Serum albumin                                        | P02768 (not in isoform 2) |             | LVNEVTEFAK           | 575.31 | 218.15 | 579.32 | 226.16 |
| Serum amyloid A-1 and A-2 proteins                   | P0DJ18 P0DJ19             | SAA2        | EANYIGSDK            | 498.74 | 406.19 | 502.74 | 414.21 |
| Serum amyloid A-4 protein                            | P35542                    | SAA4        | GNYDAAQR             | 447.71 | 445.25 | 452.71 | 455.26 |
| Serum amyloid P-component                            | P02743                    | APCS        | IVLGQEQDSYGGK        | 697.35 | 591.28 | 701.36 | 595.28 |
| Serum paraoxonase/arylesterase 1                     | P27169                    | PON1        | IFFYDSENPPASEVLR     | 942.46 | 868.49 | 947.47 | 878.50 |
| Serum paraoxonase/lactonase 3                        | Q15166                    | PON3        | ILIGTVFHK            | 343.21 | 401.23 | 345.89 | 405.24 |
| Sex hormone-binding globulin                         | P04278                    | SHBG        | TSSSFEVR             | 456.72 | 724.36 | 461.73 | 734.37 |
| SPARC                                                | P09486                    | SPARC       | LEAGDHPVELLAR        | 473.92 | 589.32 | 477.26 | 594.32 |
| Spermine oxidase                                     | Q9NWM0                    | SMOX        | YYSTTHGALLSGQR       | 518.60 | 614.33 | 521.93 | 619.33 |
| Sterile alpha motif domain-containing protein 9-like | Q8IVG5                    | SAMD9L      | ENVLDEVANAK          | 601.31 | 859.45 | 605.31 | 867.47 |
| Stromelysin-1                                        | P08254                    | MMP3        | TYFFVEDK             | 524.75 | 784.39 | 528.76 | 792.40 |
| Target of Nesh-SH3                                   | Q7Z7G0                    | ABI3BP      | IYLSDSLTK            | 548.80 | 277.15 | 552.80 | 277.15 |
| TBC1 domain family member 10A                        | Q9BXI6                    | TBC1D10A    | YLPGYSEK             | 560.27 | 422.20 | 564.28 | 426.20 |
| Tenascin                                             | P24821                    | TNC         | FTTDLDSR             | 526.26 | 803.39 | 531.26 | 813.40 |
| Tenascin-X                                           | P22105 Q16473             | TNXB   TNXA | ILISGLEPSTPYR        | 723.40 | 720.37 | 728.41 | 730.38 |
| Tetranectin                                          | P05452                    | CLEC3B      | NWETEITAQPDGK        | 773.36 | 473.24 | 777.37 | 481.25 |
| Thrombomodulin                                       | P07204                    | THBD        | SSVAADVISLLLNGDGGVGR | 634.01 | 731.34 | 637.35 | 741.35 |
| Thrombospondin-1                                     | P07996                    | THBS1       | GTLLALER             | 436.76 | 488.28 | 441.77 | 498.29 |
| Thrombospondin-4                                     | P35443                    | THBS4       | KPQDFLEELK           | 416.23 | 518.28 | 418.90 | 526.30 |
| Thyroglobulin                                        | P01266                    | TG          | FSPDDSAGASALLR       | 703.85 | 586.80 | 708.85 | 591.80 |
| Thyroxine-binding globulin                           | P05543                    | SERPINA7    | AVLHIGEK             | 289.51 | 348.71 | 292.18 | 352.71 |
| Tissue_factor_pathway_inhibitor                      | P10646                    | TFPI        | FYYNSVIGK            | 545.78 | 780.43 | 549.79 | 788.44 |
| Tissue-type plasminogen activator                    | P00750                    | PLAT        | VVPGEEEQK            | 507.76 | 816.37 | 511.77 | 824.39 |
| Transcription factor SOX-1                           | P35716                    | SOX11       | AAQSGDYGGAGDDYVLGSLR | 657.97 | 545.34 | 661.31 | 555.35 |
| Transferrin receptor protein 1                       | P02786                    | TFRC        | GFVEPDHYVVVGAQR      | 558.29 | 734.88 | 561.62 | 739.88 |
| Transthyretin                                        | P02766                    | TTR         | GSPAINVAVHVFRR       | 456.26 | 611.86 | 459.59 | 616.86 |
| Tumor necrosis factor receptor superfamily member 1A | P19438                    | TNFRSF1A    | LGLSDHEIDR           | 385.53 | 521.25 | 388.87 | 526.26 |
| Tumor necrosis factor receptor superfamily member 1B | P20333                    | TNFRSF1B    | DEQVPFSK             | 475.23 | 478.27 | 479.24 | 486.28 |

|                                      |                      |                       |                      |        |         |        |         |
|--------------------------------------|----------------------|-----------------------|----------------------|--------|---------|--------|---------|
| Vascular cell adhesion protein 1     | P19320               | VCAM1                 | NTVISVNPSTK          | 580.32 | 845.47  | 584.33 | 853.49  |
| Vascular endothelial growth factor B | O43915 P49765 P15692 | VEGFD   VEGFB   VEGFA | VVSWIDVYTR           | 619.33 | 1039.52 | 624.34 | 1049.53 |
| Vascular endothelial growth factor D | O43915               | VEGFD                 | DLIQHPK              | 425.74 | 622.37  | 429.75 | 630.38  |
| Vascular non-inflammatory molecule 3 | Q9NY84               | VNN3                  | TETPVSK              | 381.21 | 231.10  | 385.21 | 231.10  |
| Vasorin                              | Q6EMK4               | VASN                  | YLQGSSVQLR           | 575.81 | 746.42  | 580.82 | 756.42  |
| Vitamin D-binding protein            | P02774               | GC                    | VLEPTLK              | 400.25 | 587.34  | 404.26 | 595.35  |
| Vitamin K-dependent protein C        | P04070               | PROC                  | LGEYDLR              | 433.22 | 752.36  | 438.23 | 762.37  |
| Vitamin K-dependent protein S        | P07225               | PROS1                 | VYFAGFPR             | 478.75 | 694.37  | 483.76 | 704.38  |
| Vitamin K-dependent protein Z        | P22891               | PROZ                  | DFAEHLIPR            | 404.22 | 474.78  | 407.56 | 479.79  |
| Vitronectin                          | P04004               | VTN                   | FEDGVLDPDYPR         | 711.83 | 647.31  | 716.83 | 657.32  |
| von Willebrand factor                | P04275               | VWF                   | ILAGPAGDSNVV<br>K    | 620.85 | 472.25  | 624.86 | 476.25  |
| Xaa-Pro dipeptidase                  | P12955               | PEPD                  | AVYEAVLR             | 460.76 | 750.41  | 465.77 | 760.42  |
| Zinc-alpha-2-glycoprotein            | P25311               | AZGP1                 | EIPAWVPFDPAA<br>QITK | 891.97 | 1087.58 | 895.98 | 1095.59 |

**Table S2.** Comparison of studied hemostasis parameters between study groups.

| Parameter      | AMI control                 | AMI post-COVID              | Control                      | Control post-COVID     | <i>p</i> adj.<br>AMI control<br>vs AMI post-<br>COVID | <i>p</i> adj.<br>AMI control<br>vs Control | <i>p</i> adj.<br>AMI post-<br>COVID vs<br>Control post-<br>COVID | <i>p</i> adj.<br>AMI post-<br>COVID vs<br>Control |
|----------------|-----------------------------|-----------------------------|------------------------------|------------------------|-------------------------------------------------------|--------------------------------------------|------------------------------------------------------------------|---------------------------------------------------|
| A10, mm        | 48 [41; 55]                 | 42 [36; 51]                 | 42 [38; 48]                  | 42 [37; 47.5]          | 0.2051                                                | 0.1008                                     | 0.945                                                            | 0.7705                                            |
| A15, mm        | 54 [49; 60]                 | 50 [43; 55]                 | 49 [47; 53]                  | 49 [45; 54]            | 0.126                                                 | 0.0635                                     | 0.9798                                                           | 0.8012                                            |
| A20, mm        | 57 [53; 61]                 | 53 [47; 58]                 | 52 [49; 56]                  | 53 [49; 57.5]          | 0.1282                                                | 0.044                                      | 0.945                                                            | 0.6919                                            |
| A30, mm        | 58 [55; 63]                 | 55 [49; 60]                 | 55 [51; 57]                  | 55 [51; 59]            | 0.1173                                                | 0.0467                                     | 0.9743                                                           | 0.7143                                            |
| ADP, AU×min    | 69 [42; 85]                 | 57.5 [46.25; 66.5]          | 67 [54.5; 76.5]              | 63 [49.5; 71]          | 0.7853                                                | 0.9498                                     | 0.5866                                                           | 0.2224                                            |
| ASPI, AU×min   | 40 [21; 47]                 | 26 [18; 40.75]              | 60 [45; 65]                  | 58 [47.5; 68]          | 0.3568                                                | 0.0535                                     | 0.0001                                                           | 0.0002                                            |
| CFT, s         | 187 [138; 245]              | 195 [150; 277]              | 227 [155; 294]               | 222 [176; 275]         | 0.5056                                                | 0.2297                                     | 0.5663                                                           | 0.6964                                            |
| CLT, min       | 20.3 [15.7; 24.3]           | 20.5 [15.32; 26.02]         | 19.6 [16.92; 22.9]           | 23.2 [20.3; 30.4]      | 0.9157                                                | 0.9787                                     | 0.2036                                                           | 0.9127                                            |
| CS, mcm        | 1267.5 [1216; 1446]         | 1384.5 [1245.12; 1450]      | 1225 [1164.5; 1342]          | 1159 [1044.25; 1246.5] | 0.6023                                                | 0.3568                                     | 0.0026                                                           | 0.0988                                            |
| CT, s          | 647 [503; 727]              | 722 [578; 844]              | 645 [542; 885]               | 717 [625; 834]         | 0.1715                                                | 0.562                                      | 0.6689                                                           | 0.8297                                            |
| D, a.u.        | 27381.5 [25505.75; 31961.5] | 25461.5 [22630.75; 27474.5] | 22996.5 [21665.75; 24478.25] | 23565 [22216; 26854.5] | 0.0792                                                | 0.0023                                     | 0.5056                                                           | 0.0535                                            |
| LI, %          | 44.5 [33.1; 49.9]           | 45.45 [31.82; 53.5]         | 44.6 [37.33; 50.38]          | 51 [47.4; 54.4]        | 0.8524                                                | 0.9157                                     | 0.1715                                                           | 0.8587                                            |
| LI60 (%)       | 95 [ 94; 97]                | 95 [93; 97]                 | 95 [93; 97]                  | 96 [93.5; 97]          | 0.4678                                                | 0.872                                      | 0.6059                                                           | 0.6689                                            |
| LOT, min       | 23.9 [20.8; 24.7]           | 23.4 [19.6; 28.12]          | 20.25 [18.38; 22.95]         | 23.8 [20.5; 27.5]      | 0.9669                                                | 0.3573                                     | 0.5663                                                           | 0.4142                                            |
| LP, %/min      | 5.2 [4; 7.4]                | 4.95 [3.3; 7.77]            | 5.15 [3.95; 6.53]            | 3.8 [3.1; 4.5]         | 0.8043                                                | 0.8012                                     | 0.1367                                                           | 0.9437                                            |
| LTE, min       | 22.7 [16.2; 28.9]           | 21.65 [16.68; 31.45]        | 22.75 [17.85; 29.55]         | 28.2 [24.6; 36.5]      | 1                                                     | 0.8627                                     | 0.0732                                                           | 0.8087                                            |
| MCF, mm        | 59 [56; 64]                 | 56 [50; 60]                 | 56 [52; 58]                  | 56 [52; 59]            | 0.0784                                                | 0.044                                      | 0.9265                                                           | 0.9157                                            |
| ML, %          | 20 [18; 25]                 | 23 [21; 28]                 | 23 [21; 26]                  | 24 [19.5; 26]          | 0.1091                                                | 0.3532                                     | 0.3926                                                           | 0.7189                                            |
| Tlag, min      | 1.1 [1; 1.12]               | 1 [0.9; 1.17]               | 0.95 [0.8; 1]                | 1 [0.8; 1]             | 0.5964                                                | 0.0336                                     | 0.157                                                            | 0.1361                                            |
| TRAP-6, AU×min | 106 [77; 123]               | 101.5 [82.25; 119]          | 97 [86; 106]                 | 94 [86.5; 105]         | 0.9437                                                | 0.4976                                     | 0.3408                                                           | 0.3483                                            |
| Tsp, min       | 26.1 [22.65; 36.5]          | 31.7 [26.1; 53.2]           | 28.15 [21.4; 45.15]          | 43.7 [28; 51.75]       | 0.3408                                                | 0.817                                      | 0.7053                                                           | 0.4829                                            |
| V, µm/min      | 34.8 [31.28; 44.05]         | 34.75 [30.96; 38.68]        | 32.1 [30; 39.5]              | 29.2 [26; 32.9]        | 0.6644                                                | 0.3367                                     | 0.0075                                                           | 0.5652                                            |
| Vi, µm/min     | 58.7 [55.6; 65.3]           | 63.4 [58.5; 66.38]          | 56.1 [53.08; 57.77 ]         | 52.6 [48.95; 56.45]    | 0.5652                                                | 0.1361                                     | 0.0003                                                           | 0.0027                                            |

|                               |                      |                    |                 |                |        |        |        |        |
|-------------------------------|----------------------|--------------------|-----------------|----------------|--------|--------|--------|--------|
| Vst, $\mu\text{m}/\text{min}$ | 31.85 [31.17; 39.82] | 34.7 [30.65; 38.6] | 32.1 [30; 39.5] | 29 [26; 32.71] | 0.9217 | 0.7307 | 0.0069 | 0.6626 |
| $\alpha$ , $^{\circ}$         | 57 [49; 65]          | 55 [46.75; 63]     | 52 [45; 60]     | 52 [46; 57.5]  | 0.4288 | 0.1472 | 0.5536 | 0.4992 |

Green:  $p$  adj.  $< 0.1$ . Parameters of rotational thromboelastometry: CT - clotting time, CFT - clot formation time, A10-A30 - clot amplitudes at 10-30 min, MCF - maximum clot firmness,  $\alpha$  - angle between the middle axis and the tangential line to the clotting curve through the 2-mm amplitude point, LI60 - clot lysis index at 60 min, ML - maximum lysis. Parameters of thrombodynamics: V - clot growth rate, Vi - initial clot growth rate, Vst – stationary clot growth rate, Tlag - Lag-time, the delay between the test start and the clot formation onset, CS - clot size, D - clot density, Tsp - spontaneous clots formation time, LOT - lysis onset time, LP - the rate of lysis progression, CLT - the clot lysis time, LI - percent of remaining clot density, LTE - the expected clot lysis time. Parameters of impedance aggregometry: ASPI - platelet activation with arachidonic acid, ADP- platelet activation with adenosine diphosphate, TRAP-6 - platelet activation with thrombin receptor-activated peptide-6.

**Table S3.** Functional groups of proteins analyzed in the study.

| Group of proteins    | Included proteins                                                                                                                                                                                                                                                                                                                                                                                                                                                                                    |
|----------------------|------------------------------------------------------------------------------------------------------------------------------------------------------------------------------------------------------------------------------------------------------------------------------------------------------------------------------------------------------------------------------------------------------------------------------------------------------------------------------------------------------|
| Hemostasis           | Alpha-2-antiplasmin, alpha-2-macroglobulin, beta-2-glycoprotein 1, C4b-binding protein alpha chain, coagulation factor IX, coagulation factor XII, coagulation factor XIII A chain, coagulation factor XIII B chain, fibrinogen beta chain, fibrinogen gamma chain, fibronectin, hyaluronan-binding protein 2, kallistatin, plasma serine protease inhibitor, protein Z-dependent protease inhibitor, prothrombin, serotransferrin, vitamin K-dependent protein S, vitronectin, carbonic anhydrase 1 |
| Extracellular matrix | Proteins and regulators of extracellular matrix - fibronectin, tenascin-X, lumican, fibulin-1, vitronectin, alpha-1-antitrypsin, fetuin-B, inter-alpha-trypsin inhibitor heavy chain H2, tetranectin, Xaa-Pro dipeptidase, alpha-2-macroglobulin                                                                                                                                                                                                                                                     |
| Endothelium          | Proteins regulating the state of endothelium - angiogenin, insulin-like growth factor-binding protein 2, insulin-like growth factor-binding protein 3, insulin-like growth factor-binding protein complex acid labile subunit, retinol-binding protein 4, pigment epithelium-derived factor, clusterin                                                                                                                                                                                               |
| Inflammation         | Proteins involved in inflammation excluding complement system proteins - L-selectin, phosphatidylinositol-glycan-specific phospholipase D, plasmin-2, attractin, ficolin-2, extracellular matrix protein 1, alpha-2-macroglobulin, fibrinogen beta chain, fibrinogen gamma chain, C-reactive protein, haptoglobin, leucine-rich alpha-2-glycoprotein, ceruloplasmin, hemopexin, lipopolysaccharide-binding protein                                                                                   |
| Complement system    | Alpha-2-macroglobulin, C4b-binding protein alpha chain, complement C1q subcomponent subunit A, complement C1q subcomponent subunit B, complement C3, complement C4, complement C5, complement C6, complement C8 alpha chain, complement C8 beta chain, complement C9, complement factor B, complement factor I, ficolin-2, mannan-binding lectin serine protease 2A, plasma protease C1 inhibitor, vitronectin                                                                                       |
| Lipid metabolism     | Apolipoprotein A-I, apolipoprotein A-IV, apolipoprotein B-100, apolipoprotein C-I, apolipoprotein C-II, apolipoprotein C-III, apolipoprotein C-IV, apolipoprotein E, apolipoprotein F, apolipoprotein L1, apolipoprotein M,                                                                                                                                                                                                                                                                          |

|                           |                                                                                                                                                     |
|---------------------------|-----------------------------------------------------------------------------------------------------------------------------------------------------|
|                           | hemopexin, phosphatidylcholine-sterol acyltransferase, phospholipid transfer protein, serum amyloid A-1 and A-2 proteins, zinc-alpha-2-glycoprotein |
| Calcification             | Regulators of bone and vascular calcification - alpha-2-HS-glycoprotein, carbonic anhydrase 1, matrix Gla protein                                   |
| Steroid hormone transport | Corticosteroid-binding globulin, sex hormone-binding globulin                                                                                       |

Proteins were divided into the functional groups manually based on UniProt and NCBI gene databases, and articles in PubMed.

**Table S4.** Comparison of studied proteomics parameters between study groups.

| Parameter               | AMI control                | AMI post-COVID               | Control                     | Control post-COVID          | <i>p</i> adj.<br>AMI control<br>vs AMI post-<br>COVID | <i>p</i> adj.<br>AMI control<br>vs Control | <i>p</i> adj.<br>AMI post-<br>COVID vs<br>Control post-<br>COVID | <i>p</i> adj.<br>AMI post-<br>COVID vs<br>Control |
|-------------------------|----------------------------|------------------------------|-----------------------------|-----------------------------|-------------------------------------------------------|--------------------------------------------|------------------------------------------------------------------|---------------------------------------------------|
| Alpha-1-antitrypsin     | 4850.4 [4328.2;<br>6422.7] | 4603.1 [4255.75;<br>5162.05] | 4477.9 [4143.35;<br>4858.5] | 4241.5 [3836;<br>4652.25]   | 0.2451                                                | 0.126                                      | 0.0764                                                           | 0.5799                                            |
| Alpha-2-antiplasmin     | 404.52 [337.33;<br>431.16] | 374.36 [327.72;<br>415.78]   | 377.82 [342.46;<br>410.59]  | 373.2 [347.68;<br>401.12]   | 0.3568                                                | 0.4526                                     | 0.9498                                                           | 0.8584                                            |
| Alpha-2-HS-glycoprotein | 187.36 [134.2;<br>215.67]  | 178.36 [163.44;<br>197.78]   | 180.3 [165.81;<br>223.02]   | 188.91 [173.05;<br>211.91]  | 0.9265                                                | 0.6644                                     | 0.3563                                                           | 0.5964                                            |
| Alpha-2-macroglobulin   | 1120.2 [852.92;<br>1313.5] | 929.15 [817.2;<br>1130.7]    | 918.36 [837.66;<br>1080.6]  | 1017.7 [908.24;<br>1159.85] | 0.3568                                                | 0.3532                                     | 0.3576                                                           | 0.9849                                            |
| Angiogenin              | 8.5 [6.52; 14.68]          | 10.27 [6.64; 14.68]          | 5.62 [3.87; 8.53]           | 4.78 [3.52; 7.29]           | 0.9265                                                | 0.024                                      | 0.0001                                                           | 0.0036                                            |
| Apolipoprotein A-I      | 15805 [6799.8;<br>16384]   | 15607 [8164; 18507]          | 20361 [16404.5;<br>22429]   | 20211 [18708.5;<br>23508.5] | 0.5493                                                | 0.0056                                     | 0.0002                                                           | 0.0075                                            |
| Apolipoprotein A-IV     | 76.38 [59.78;<br>105.86]   | 85.54 [67.3; 104.11]         | 86.77 [75.24;<br>114.92]    | 95.95 [85.2; 108.26]        | 0.817                                                 | 0.3408                                     | 0.0792                                                           | 0.4291                                            |
| Apolipoprotein B-100    | 32.01 [27.79; 38.29 ]      | 32.56 [25.23; 42.47]         | 29.79 [25.4; 33.93]         | 24.97 [19.95; 29.88]        | 0.8867                                                | 0.5731                                     | 0.029                                                            | 0.367                                             |
| Apolipoprotein C-I      | 450.5 [ 383.4;<br>697.52]  | 616.32 [420.86;<br>827.77]   | 634.85 [507.28;<br>712.32]  | 651.92 [565.49;<br>724.19]  | 0.3408                                                | 0.154                                      | 0.7145                                                           | 0.9743                                            |
| Apolipoprotein C-II     | 77.56 [66.17; 91.83]       | 83.13 [53.63;<br>108.04]     | 55.07 [43.06; 87.77]        | 60.02 [47.87; 70.24]        | 0.8933                                                | 0.1367                                     | 0.0891                                                           | 0.0764                                            |
| Apolipoprotein C-III    | 393.85 [314.52;<br>438.92] | 356.49 [270.98;<br>482.95]   | 290.97 [228.26;<br>382.9]   | 274.6 [222.4;<br>334.56]    | 0.817                                                 | 0.0792                                     | 0.0134                                                           | 0.1028                                            |
| Apolipoprotein C-IV     | 21.44 [ 12.82; 28.16]      | 20.3 [16.09; 35.61]          | 18.59 [12.36; 25.52]        | 16.72 [12.34; 28.02]        | 0.679                                                 | 0.6562                                     | 0.2497                                                           | 0.3516                                            |
| Apolipoprotein E        | 123.35 [105.36; 159]       | 149.54 [130.06;<br>180.2]    | 146.62 [119.59;<br>173.57]  | 141.03 [127.72;<br>158.73]  | 0.3522                                                | 0.3396                                     | 0.7699                                                           | 0.943                                             |
| Apolipoprotein F        | 152.14 [102.22;<br>187.36] | 128.85 [110.41;<br>161.37]   | 148.31 [134.47;<br>180.4]   | 143.44 [131.08;<br>162.45]  | 0.7109                                                | 0.6689                                     | 0.336                                                            | 0.0764                                            |
| Apolipoprotein L1       | 44.29 [42.08; 53.86]       | 54.58 [47.8; 69.57]          | 49.42 [43.78; 63.75]        | 51.45 [44.65; 59.09]        | 0.1028                                                | 0.3997                                     | 0.336                                                            | 0.3568                                            |
| Apolipoprotein M        | 79.58 [57.2; 114.06]       | 93.09 [69.78;<br>118.72]     | 75.13 [67.38; 100.5]        | 79.64 [67.43; 95.54]        | 0.6676                                                | 0.9787                                     | 0.3757                                                           | 0.3576                                            |
| Attractin               | 34.53 [29.33; 38.11]       | 36.53 [32.11; 40.24]         | 33.07 [29.08; 37.77]        | 34.97 [31.82; 38.33]        | 0.4293                                                | 0.5944                                     | 0.5056                                                           | 0.0764                                            |
| Beta-2-glycoprotein 1   | 295.42 [233.94;<br>323.89] | 261.99 [241.12;<br>295.69]   | 233.29 [215.05;<br>270.67]  | 245.42 [220.39;<br>265.85]  | 0.5592                                                | 0.057                                      | 0.1008                                                           | 0.0732                                            |

|                                       |                         |                          |                         |                          |        |        |        |        |
|---------------------------------------|-------------------------|--------------------------|-------------------------|--------------------------|--------|--------|--------|--------|
| C-reactive protein                    | 4.5 [2.23; 10.9]        | 3.73 [2.33; 6.91]        | 1.52 [0.93; 2.44]       | 2.12 [1.42; 4.27]        | 0.3997 | 0.0026 | 0.0666 | 0.0022 |
| C4b-binding protein alpha chain       | 255.69 [224.54; 357.26] | 215.84 [176.55; 284.52]  | 221 [164.42; 276.26]    | 295.53 [234.54; 329.51]  | 0.0811 | 0.1282 | 0.0187 | 0.9552 |
| Carbonic anhydrase 1                  | 3.07 [1.69; 5.14]       | 2.38 [1.35; 3.74]        | 1.81 [1.38; 3.59]       | 1.69 [1.28; 2.71]        | 0.4895 | 0.4526 | 0.3532 | 0.7853 |
| Ceruloplasmin                         | 117.91 [99.87; 153.04]  | 109.53 [93.48; 141.34]   | 105.34 [92.19; 126.28]  | 107.57 [96.29; 127.71]   | 0.5364 | 0.3568 | 0.9798 | 0.6975 |
| Clusterin                             | 5946.3 [5104.3; 6786.1] | 5750.3 [5027.4; 6941.15] | 6314 [5596.5; 7532.65]  | 6154.5 [5333.6; 6911.35] | 0.6689 | 0.5652 | 0.4473 | 0.1884 |
| Coagulation factor IX                 | 13.34 [11.47; 14.87]    | 12.07 [10.37; 13.33]     | 10.65 [8.79; 12.12]     | 10.4 [9; 12.49]          | 0.2463 | 0.0053 | 0.1326 | 0.0754 |
| Coagulation factor XII                | 20.17 [17.8; 21.55]     | 15.62 [13.72; 20.66]     | 22.11 [17.1; 25.3]      | 19.74 [17.39; 24.29]     | 0.1326 | 0.3568 | 0.044  | 0.0134 |
| Coagulation factor XIII A chain       | 5.61 [4.22; 6.83]       | 6.2 [5.11; 7.51]         | 6.01 [5.23; 7]          | 6.13 [5.37; 7.09]        | 0.4437 | 0.6689 | 0.8933 | 0.693  |
| Coagulation factor XIII B chain       | 12 [7.75; 14.65]        | 9.47 [7.55; 11.72]       | 8.8 [5.62; 11.52]       | 7.92 [6.26; 9.83]        | 0.5955 | 0.1698 | 0.0364 | 0.3568 |
| Complement C1q subcomponent subunit A | 21.45 [16.74; 24.95]    | 23.05 [17.97; 25.26]     | 19.54 [17.88; 21.72]    | 17.68 [16.52; 20.72]     | 0.6975 | 0.4894 | 0.024  | 0.126  |
| Complement C1q subcomponent subunit B | 18.68 [18; 20.7]        | 17.73 [15.33; 19.71]     | 18.24 [14.15; 21]       | 16.85 [15.05; 18.93]     | 0.3408 | 0.3926 | 0.4286 | 0.9437 |
| Complement C1s subcomponent           | 421.74 [374.21; 490.98] | 409.16 [352.74; 442.65]  | 402.04 [371.22; 441.98] | 378.19 [359.47; 429]     | 0.3538 | 0.3997 | 0.7934 | 0.8933 |
| Complement C3                         | 485.03 [439.91; 527.76] | 444.43 [409.06; 526.9]   | 416.34 [362.92; 492.3]  | 400.98 [375.48; 508.1]   | 0.4993 | 0.0411 | 0.158  | 0.1091 |
| Complement C4                         | 459.97 [4.11; 527.85]   | 340.07 [4.28; 464.46]    | 418.35 [286.36; 531.12] | 435.49 [365.32; 520.32]  | 0.6626 | 0.8297 | 0.0635 | 0.336  |
| Complement C5                         | 55.16 [45.59; 69.41]    | 52.34 [48.87; 59.33]     | 42.52 [39.23; 46.65]    | 42.78 [39.4; 46.85]      | 0.4678 | 0.0001 | 0.0002 | 0      |
| Complement C6                         | 20.09 [12.86; 25.19]    | 21.81 [14.68; 30.44]     | 16.99 [12.29; 19.95]    | 12.77 [9.91; 19.58]      | 0.4993 | 0.3568 | 0.0049 | 0.044  |
| Complement C8 alpha chain             | 41.96 [36.06; 45.94]    | 37.39 [33.77; 42.26]     | 38.64 [33.75; 44.15]    | 41.32 [38.23; 44.63]     | 0.2284 | 0.4437 | 0.2451 | 0.6902 |
| Complement C8 beta chain              | 7.14 [5.82; 8.36]       | 6.85 [5.55; 7.86]        | 5.87 [5.43; 7.68]       | 7.31 [5.31; 8.83]        | 0.6975 | 0.3408 | 0.7116 | 0.4163 |
| Complement C9                         | 21.47 [19.34; 31.72]    | 22.48 [17.38; 25.29]     | 17.95 [15.45; 20.92]    | 18.19 [15.98; 22.26]     | 0.693  | 0.0764 | 0.0792 | 0.024  |
| Complement factor B                   | 111.12 [98; 121.92]     | 98.92 [87.6; 113.9]      | 87.76 [71.42; 95.13]    | 89.64 [76.21; 100.85]    | 0.1971 | 0.0049 | 0.0811 | 0.0364 |
| Complement factor I                   | 37.55 [34.34; 39.47]    | 34.6 [31.17; 38.1]       | 29.84 [26.64; 33.96]    | 32.77 [29.37; 36.07]     | 0.1361 | 0.0015 | 0.386  | 0.0467 |
| Corticosteroid-binding globulin       | 572.44 [504.68; 675.83] | 521.88 [482.4; 609.12]   | 600.08 [573.52; 645.88] | 616.34 [563.62; 664.28]  | 0.1971 | 0.4976 | 0.0026 | 0.0075 |

|                                                                        |                         |                          |                           |                           |        |        |        |        |
|------------------------------------------------------------------------|-------------------------|--------------------------|---------------------------|---------------------------|--------|--------|--------|--------|
| Extracellular matrix protein 1                                         | 9.05 [6.36; 10.38]      | 10.04 [8.75; 11.22]      | 10.93 [8.72; 11.74]       | 9.14 [8.1; 10.03]         | 0.2224 | 0.158  | 0.2198 | 0.6012 |
| Fetuin-B                                                               | 4.75 [4.03; 5.92]       | 4.84 [3.93; 5.29]        | 5.17 [3.74; 5.73]         | 4.28 [3.6; 4.9]           | 0.5408 | 0.9299 | 0.336  | 0.4976 |
| Fibrinogen beta chain                                                  | 3127.4 [2645.7; 4013.6] | 2664.4 [2237.15; 3157.8] | 2269.1 [1940.45; 2495.35] | 2303.2 [2083.05; 2711.95] | 0.0732 | 0.0022 | 0.0784 | 0.0187 |
| Fibrinogen gamma chain                                                 | 2287.4 [2035.9; 2974.8] | 2090.4 [1823.7; 2309.3]  | 1823.5 [1662.05; 1979.1]  | 1773.4 [1650.7; 2018.25]  | 0.1851 | 0.0032 | 0.0065 | 0.0134 |
| Fibronectin                                                            | 165.02 [84.22; 221.98]  | 149.12 [113.07; 169.29]  | 137.1 [105.21; 156.99]    | 120.91 [95.54; 144.49]    | 0.7109 | 0.5408 | 0.0891 | 0.5056 |
| Fibulin-1                                                              | 19.73 [15.31; 23.49]    | 17.29 [14.55; 20.74]     | 18.41 [16.52; 22.8]       | 18.67 [17.23; 20.68]      | 0.3997 | 0.9627 | 0.3006 | 0.3408 |
| Ficolin-2                                                              | 2.77 [2.08; 4.65]       | 3.76 [2.47; 5.95]        | 2.81 [1.63; 4.32]         | 2.32 [1.92; 3.65]         | 0.4829 | 0.6689 | 0.1091 | 0.2108 |
| Haptoglobin                                                            | 4013.4 [2694.1; 6977.3] | 3530.1 [2560.6; 4426.1]  | 2925.2 [1939.8; 3498.8]   | 3358.5 [2611.7; 4088.9]   | 0.3265 | 0.029  | 0.5592 | 0.0467 |
| Hemopexin                                                              | 1493 [1316; 1630.9]     | 1370.4 [1261.2; 1469.45] | 1363.6 [1238.35; 1462]    | 1373.1 [1255.35; 1482.25] | 0.2094 | 0.1653 | 0.9437 | 0.8071 |
| Hyaluronan-binding protein 2                                           | 12.11 [11.05; 13.73]    | 11.26 [9.97; 12.94]      | 11.73 [11.03; 12.33]      | 11.28 [10.46; 12.22]      | 0.1662 | 0.4976 | 0.5652 | 0.4811 |
| Insulin-like growth factor-binding protein 2                           | 1.44 [0.72; 3.08]       | 1.09 [0.64; 2]           | 0.85 [0.38; 1.96]         | 0.95 [0.79; 1.47]         | 0.3435 | 0.1367 | 0.6911 | 0.558  |
| Insulin-like growth factor-binding protein 3                           | 12.94 [10.24; 15.09]    | 12.72 [10.44; 14.25]     | 13.92 [12.47; 16.3]       | 13.69 [12.56; 15.33]      | 0.9626 | 0.2439 | 0.2451 | 0.1091 |
| Insulin-like growth factor-binding protein complex acid labile subunit | 11.28 [8.37; 13.99]     | 11.53 [8.68; 12.68]      | 13.61 [11.45; 15.09]      | 12.69 [10.7; 13.93]       | 0.7699 | 0.0754 | 0.0811 | 0.0049 |
| Inter-alpha-trypsin inhibitor heavy chain H2                           | 70.3 [65.68; 83.53]     | 74.99 [63.55; 82.29]     | 70.23 [63.76; 84.03]      | 66.98 [63.41; 73.63]      | 0.8509 | 0.9451 | 0.2934 | 0.9798 |
| Kallistatin                                                            | 8.52 [6.76; 9.24]       | 8.58 [7.39; 9.68]        | 8.14 [7.39; 9.1]          | 8.02 [7.11; 9.55]         | 0.8404 | 0.7106 | 0.7523 | 0.6059 |
| L-selectin                                                             | 59.2 [45.48; 71.91]     | 59.76 [50.53; 71.96]     | 68.63 [54.63; 76.12]      | 68.67 [60.57; 78.12]      | 0.9743 | 0.5731 | 0.0364 | 0.3516 |
| Leucine-rich alpha-2-glycoprotein                                      | 50.51 [40.16; 83.39]    | 44.7 [38.61; 53.15]      | 42.02 [37.36; 46.21]      | 40.85 [35.4; 48.74]       | 0.2925 | 0.0608 | 0.3576 | 0.2184 |
| Lipopolysaccharide-binding protein                                     | 28.19 [20.41; 35.83]    | 23.03 [17.87; 26.87]     | 17.44 [13.62; 21.21]      | 20.43 [16.62; 23.31]      | 0.0635 | 0.0009 | 0.208  | 0.0075 |
| Lumican                                                                | 17.4 [15.21; 19.6]      | 17.44 [15.99; 20.77]     | 15.03 [12.94; 17.44]      | 16.78 [15.47; 18.41]      | 0.7339 | 0.208  | 0.3532 | 0.0071 |
| Mannan-binding lectin serine protease 2A                               | 89.92 [66.11; 115.42]   | 72.63 [54.62; 90.38]     | 69.06 [53.08; 84.64]      | 42.89 [32.93; 71.61]      | 0.1732 | 0.1282 | 0.0134 | 0.7123 |
| Matrix Gla protein                                                     | 2.18 [1.27; 2.63]       | 1.8 [1.24; 2.2]          | 1.2 [0.89; 1.6]           | 1.38 [1.15; 1.76]         | 0.4437 | 0.0364 | 0.0869 | 0.0509 |
| Phosphatidylcholine-sterol acyltransferase                             | 30.82 [24.91; 36.09]    | 27.41 [22.01; 31.95]     | 30.58 [26.22; 35.09]      | 29.6 [25.82; 35.54]       | 0.2966 | 0.9787 | 0.3568 | 0.168  |

|                                                      |                         |                           |                         |                          |        |        |        |        |
|------------------------------------------------------|-------------------------|---------------------------|-------------------------|--------------------------|--------|--------|--------|--------|
| Phosphatidylinositol-glycan-specific phospholipase D | 28.71 [26.24; 31.57]    | 29.92 [25.8; 33.98]       | 26.62 [23.76; 30.99]    | 25.45 [21.66; 29.12]     | 0.9157 | 0.3532 | 0.0336 | 0.1662 |
| Phospholipid transfer protein                        | 4.26 [3.7; 4.55]        | 4.57 [3.43; 5.43]         | 4.57 [4.06; 4.89]       | 4.67 [4.17; 5.57]        | 0.5652 | 0.367  | 0.5195 | 0.9092 |
| Pigment epithelium-derived factor                    | 19.03 [17.4; 21.19]     | 15.77 [13.75; 18.26]      | 13.54 [12.01; 16.97]    | 16.32 [12.47; 17.79]     | 0.0666 | 0.0026 | 0.4728 | 0.0535 |
| Plasma protease C1 inhibitor                         | 166.85 [147.09; 220.02] | 142.37 [131.48; 167.3]    | 139.93 [126.64; 160.72] | 155.36 [134.32; 174.58]  | 0.0187 | 0.0075 | 0.5272 | 0.5932 |
| Plasma serine protease inhibitor                     | 65.91 [ 55.94; 69.3]    | 58.4 [52.61; 67.26]       | 62.04 [51.73; 66.95]    | 55.29 [46.22; 64.3]      | 0.5652 | 0.7699 | 0.1884 | 0.9437 |
| Plastin-2                                            | 6.94 [ 5.84; 7.85]      | 7.02 [5.81; 7.86]         | 6.93 [5.7; 7.38]        | 6.72 [5.88; 7.28]        | 1      | 0.6927 | 0.7934 | 0.5932 |
| Protein Z-dependent protease inhibitor               | 38.46 [29.31; 43.04]    | 32.97 [27.24; 37.58]      | 34.45 [29.99; 40.8]     | 35.57 [31.21; 39.8]      | 0.3408 | 0.6562 | 0.3006 | 0.5989 |
| Prothrombin                                          | 1026.8 [836.9; 1217.4]  | 987.23 [820.16; 1122.35]  | 968.31 [858.76; 1017.1] | 970.29 [907.05; 1057.65] | 0.6626 | 0.433  | 0.9498 | 0.5465 |
| Retinol-binding protein 4                            | 112.33 [78.45; 158.65]  | 94.19 [76.4; 115.14]      | 85.46 [79.26; 100.2]    | 104.7 [80.56; 127.97]    | 0.1971 | 0.195  | 0.4959 | 0.5652 |
| Serotransferrin                                      | 1421.3 [1384.9; 1564.5] | 1405.8 [1274.65; 1636.65] | 1521.9 [1383.8; 1989]   | 1419.2 [1322.45; 1581.5] | 0.5811 | 0.3753 | 0.8038 | 0.1054 |
| Serum amyloid A-1 and A-2 proteins                   | 13.41 [3.94; 42.99]     | 7.84 [4.03; 11.76]        | 3.82 [2.59; 7.08]       | 4.85 [2.84; 7.54]        | 0.3576 | 0.0792 | 0.1116 | 0.1282 |
| Sex hormone-binding globulin                         | 15.64 [12.56; 19.38]    | 16.89 [12.7; 20.68]       | 19.96 [17.41; 35.63]    | 25.45 [19.24; 35.67]     | 0.7859 | 0.0187 | 0.004  | 0.0075 |
| Tenascin-X                                           | 36.88 [28.12; 48.78]    | 30.94 [26.06; 38.34]      | 25.4 [21.6; 32.52]      | 23.52 [20.07; 29.56]     | 0.3568 | 0.0364 | 0.0046 | 0.0754 |
| Tetranectin                                          | 242.98 [222.38; 275.64] | 265.08 [231.85; 313.45]   | 284.27 [232.3; 314.18]  | 317.13 [274.67; 367.06]  | 0.4087 | 0.36   | 0.0075 | 0.8012 |
| Vitamin K-dependent protein S                        | 35.43 [31.16; 40.88]    | 32.16 [29.34; 34.61]      | 31.75 [26.62; 33.99]    | 30.82 [29.72; 32.38]     | 0.0535 | 0.0187 | 0.3712 | 0.367  |
| Vitronectin                                          | 571 [535.01; 646.37]    | 570.47 [481.48; 621.57]   | 518.36 [438.74; 558.46] | 488.5 [437.46; 577.18]   | 0.6012 | 0.0187 | 0.157  | 0.119  |
| Xaa-Pro dipeptidase                                  | 1.1 [0.88; 1.4]         | 1 [0.9; 1.17]             | 1.02 [0.9; 1.2]         | 0.99 [0.86; 1.21]        | 0.5465 | 0.7923 | 0.8627 | 0.9669 |
| Zinc-alpha-2-glycoprotein                            | 25.48 [20.53; 31.23]    | 21.12 [19.11; 25.84]      | 20.35 [18.09; 26.86]    | 26.24 [22.36; 30.01]     | 0.157  | 0.2439 | 0.0467 | 0.7783 |

Green:  $p$  adj. < 0.1

A

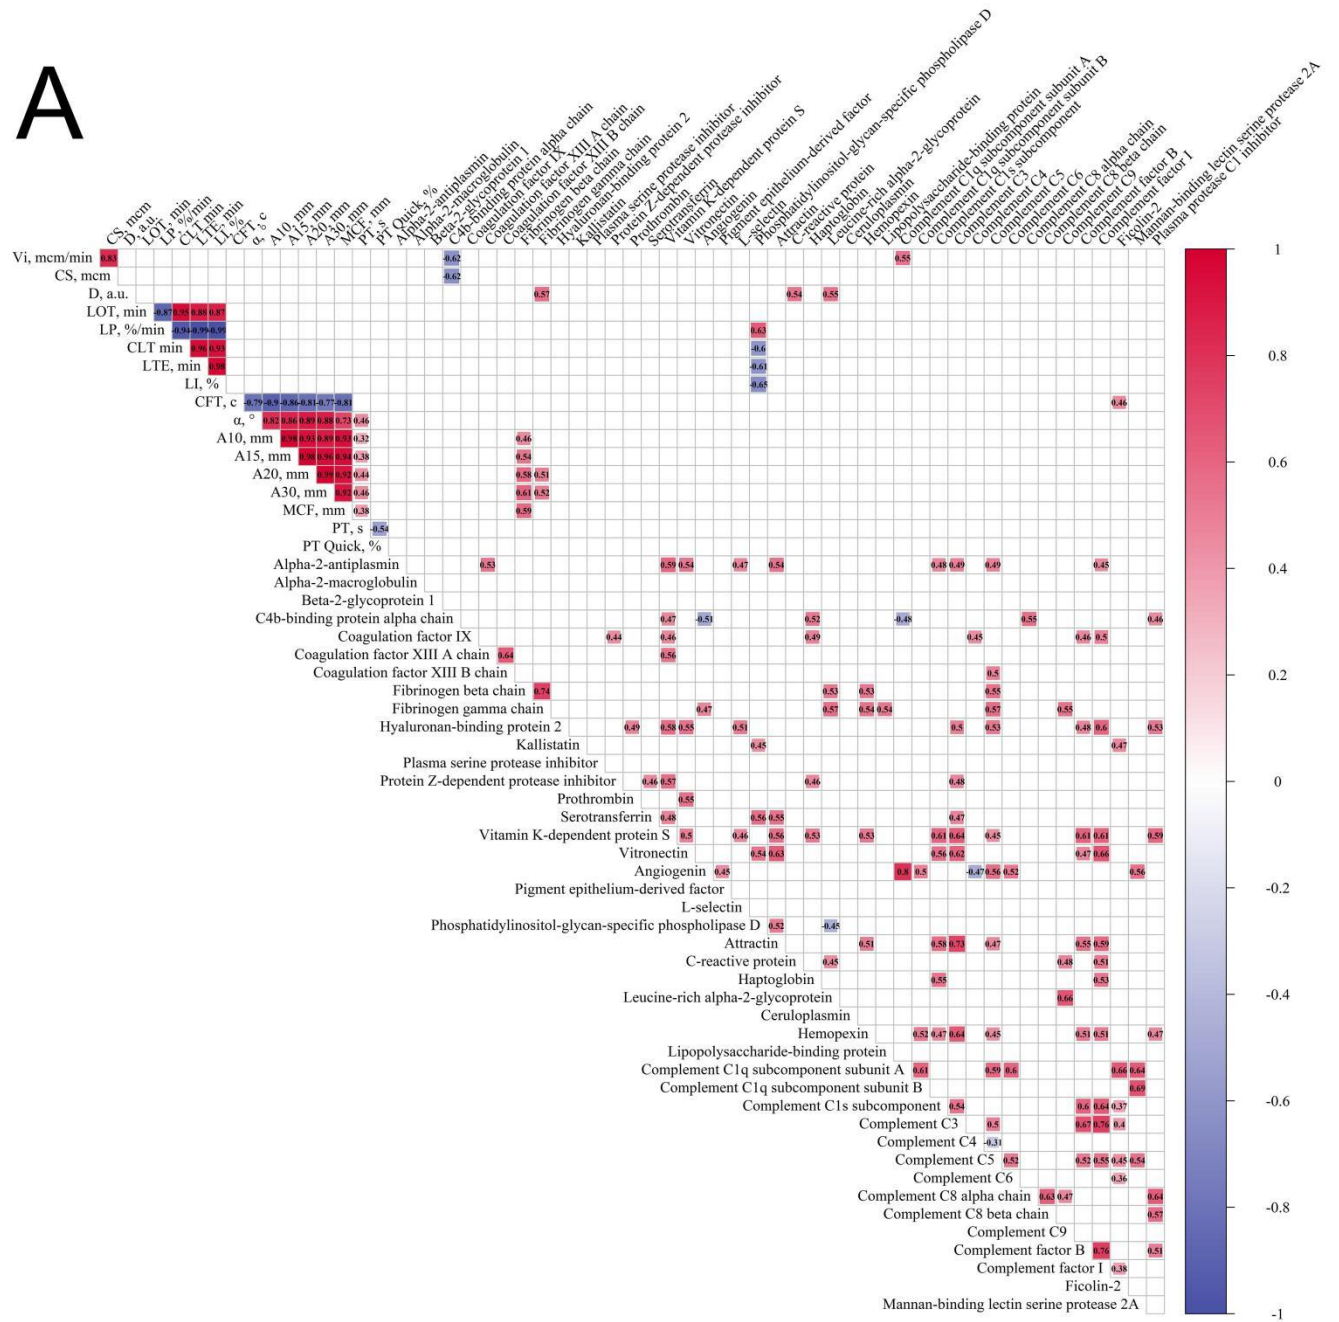

B

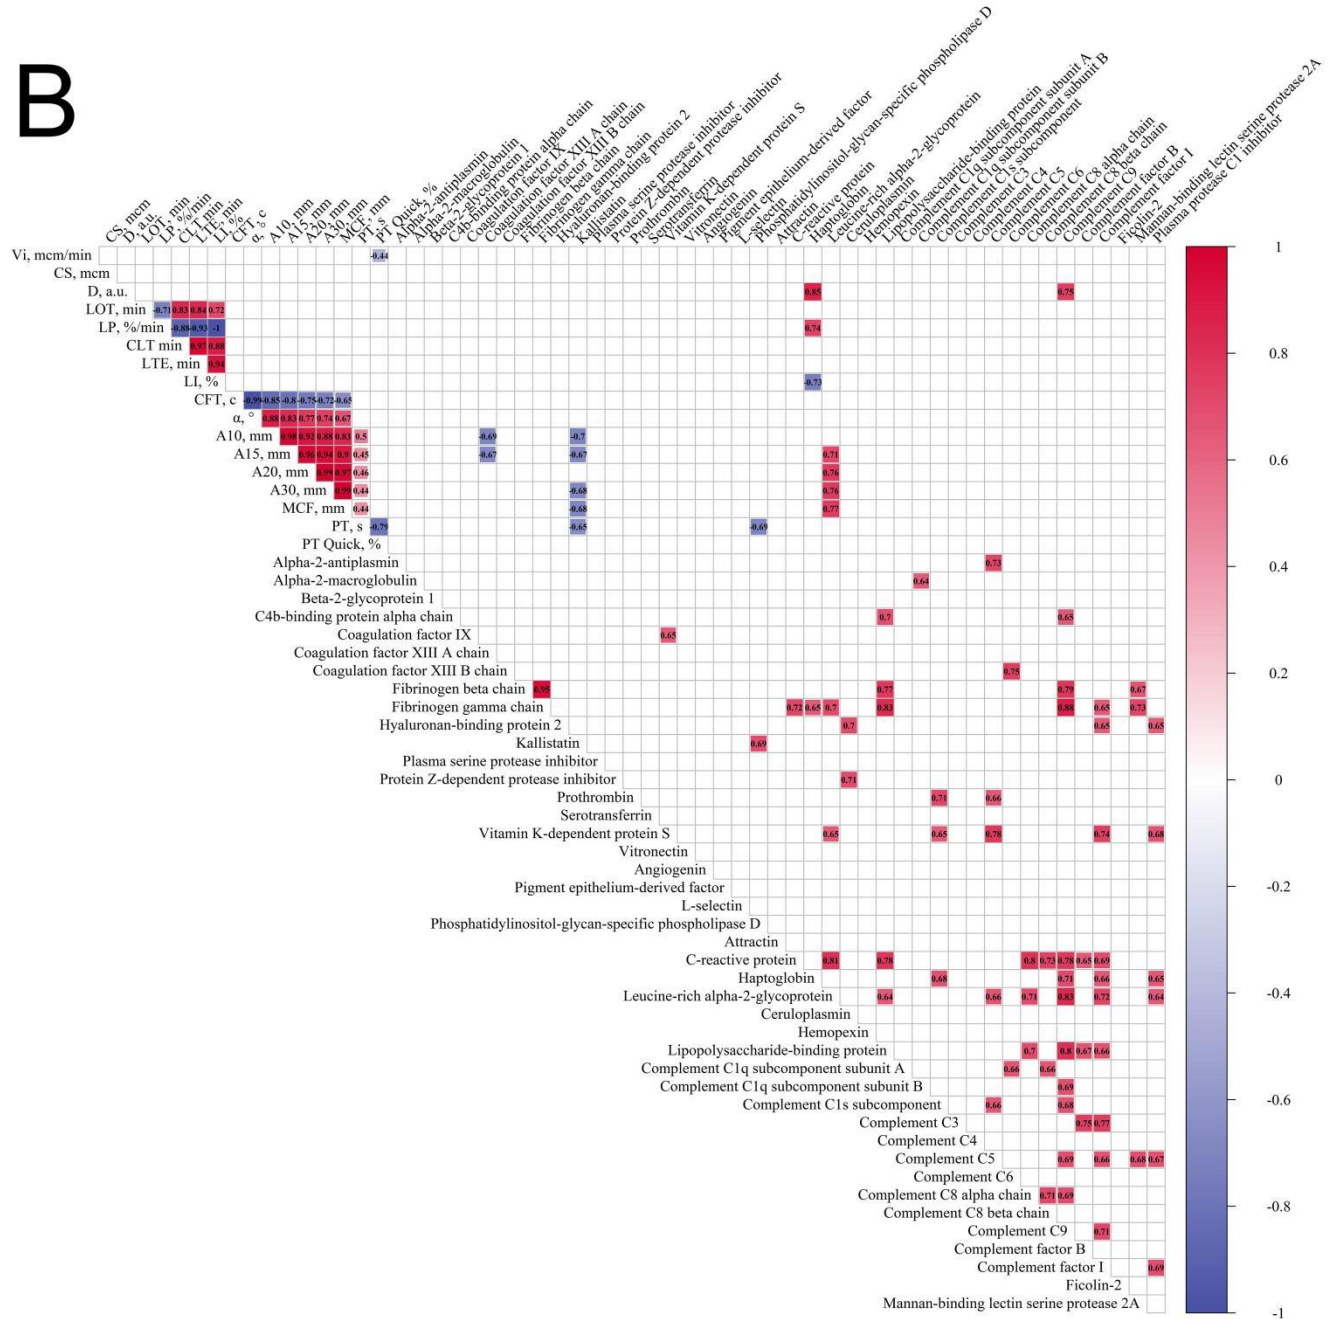

C

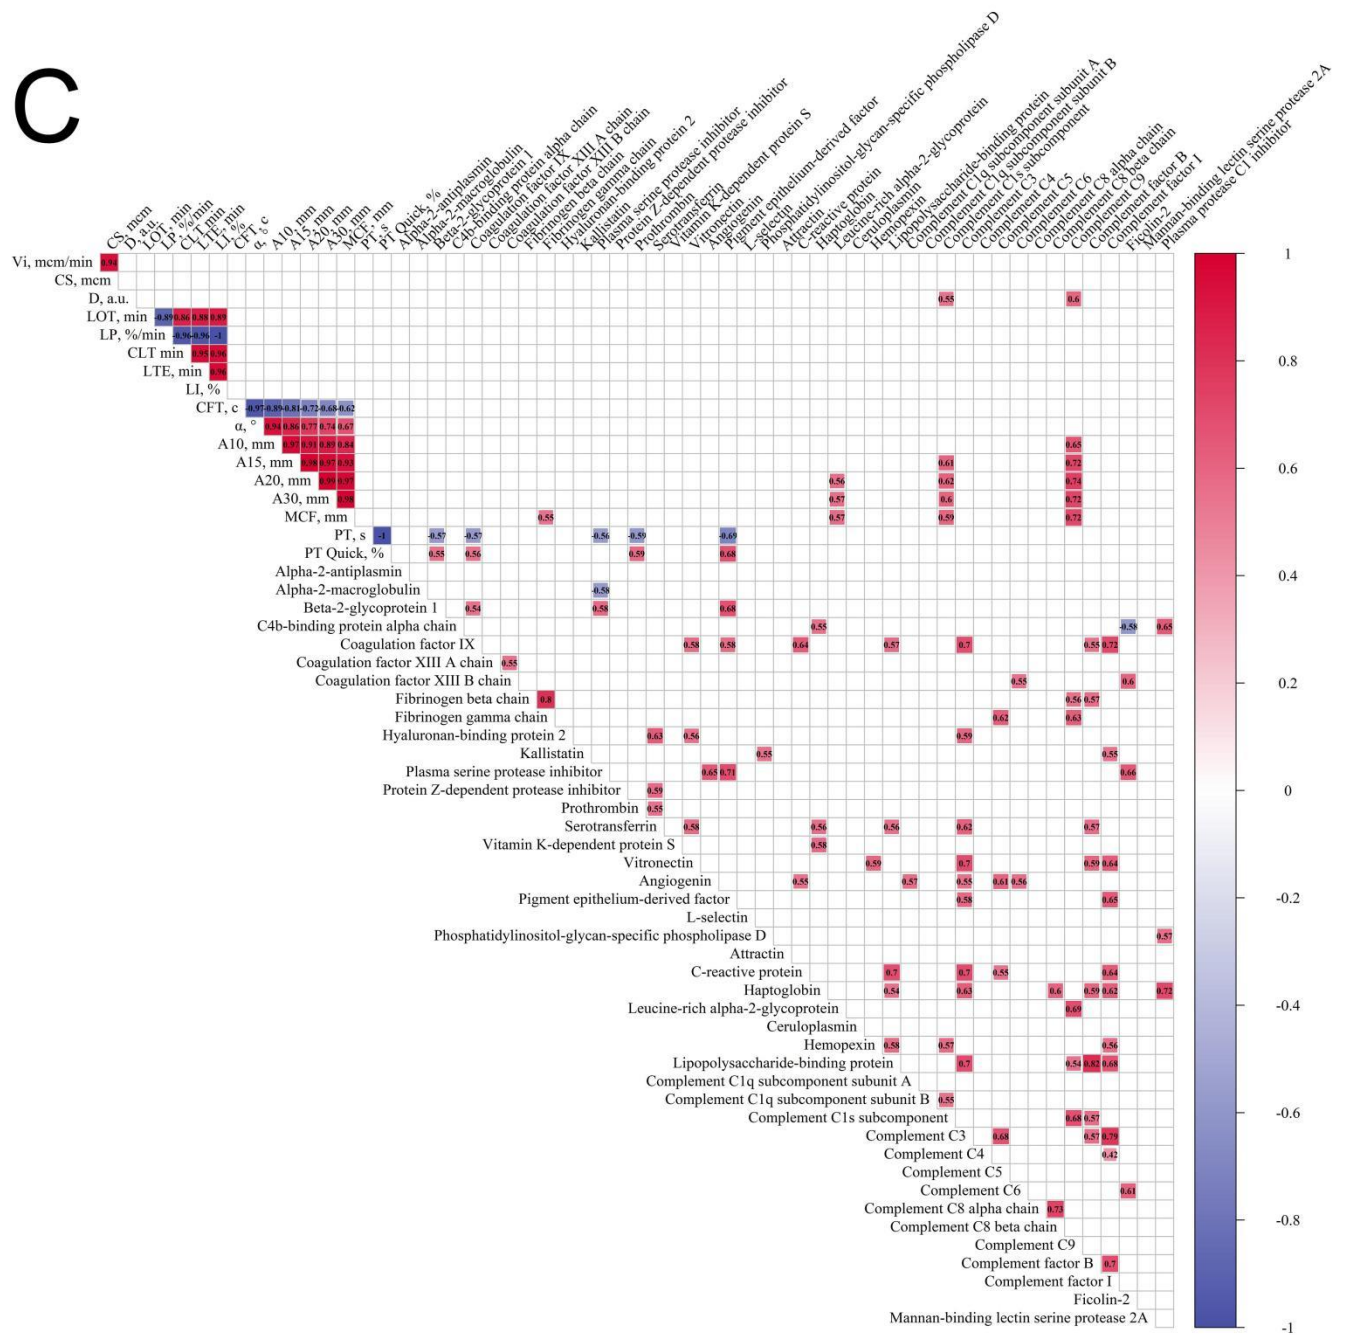

D

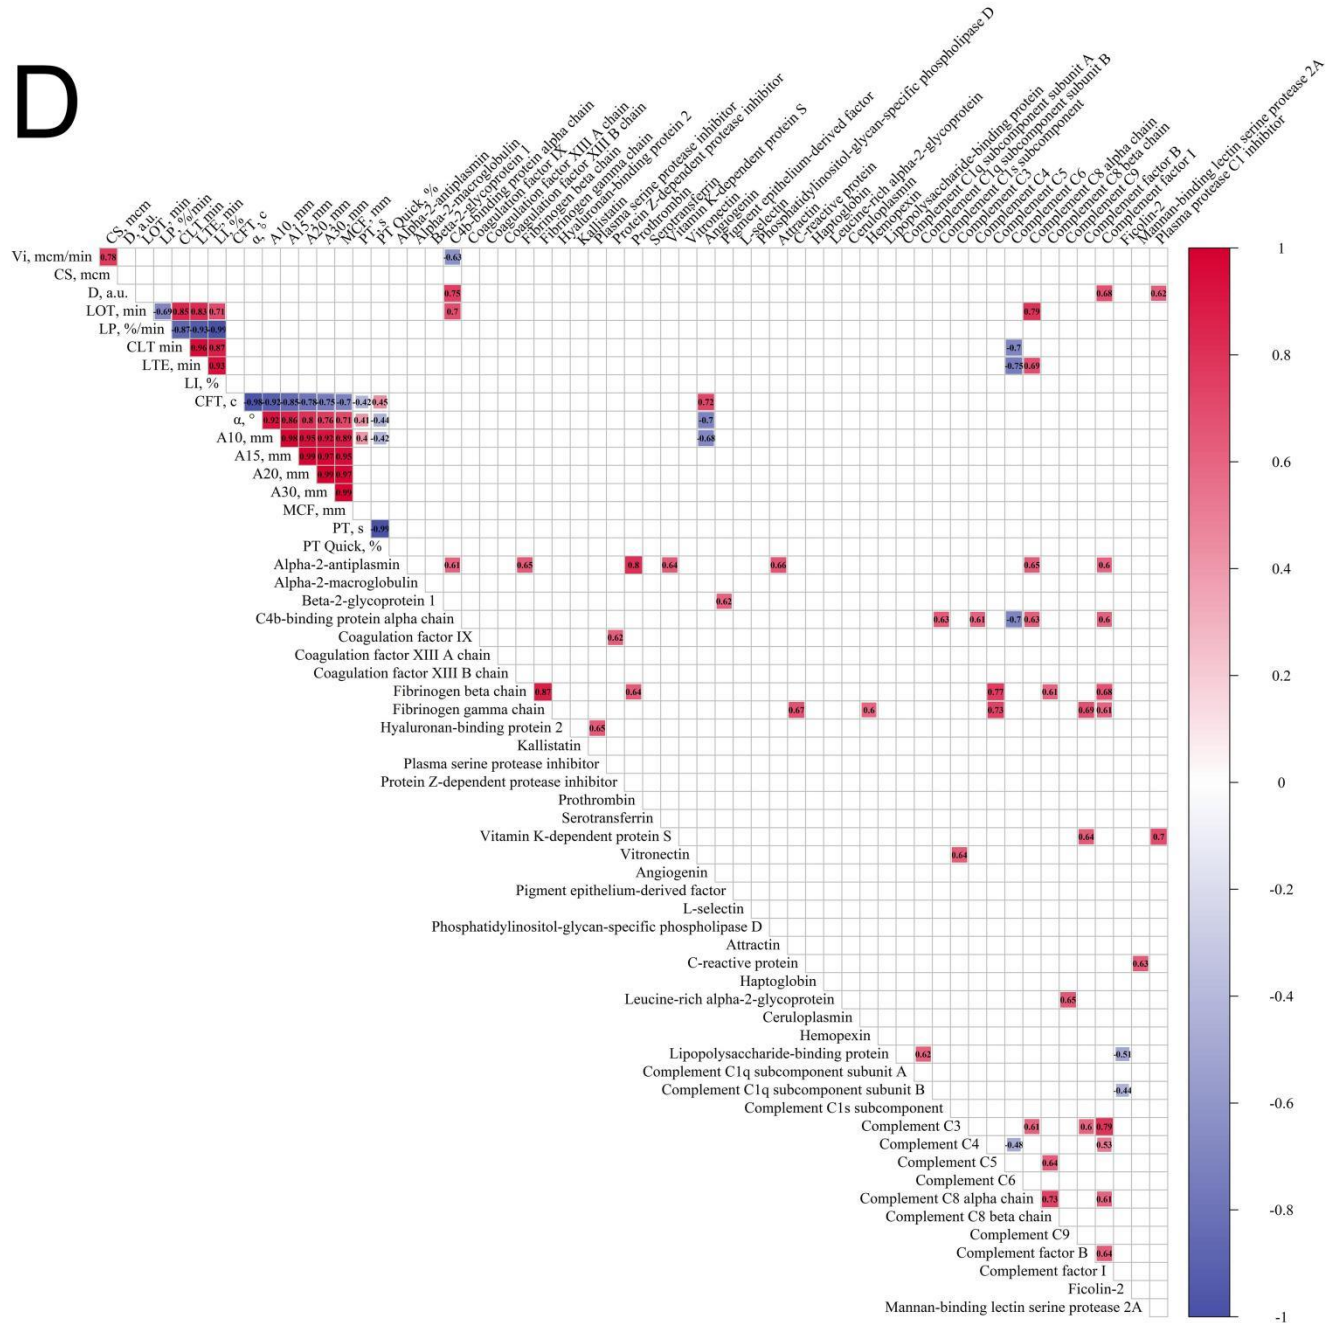

**Figure S4.** Main correlations between proteomics data and parameters of hemostasis. Targeted proteomic analysis was carried out using liquid chromatography-tandem mass spectrometry (LC-MS/MS) with multiple reaction monitoring (MRM). Parameters of hemostasis include results of rotational thromboelastometry, thrombodynamics, and coagulation blood tests. Correlation matrices demonstrate only those parameters of hemostasis and proteins connected to hemostasis which correlated with proteins connected to inflammation (our division of proteins into functional groups is presented in Table S3) and components of the complement system in at least one study group. Also, we included proteins connected to inflammation and components of the complement system if they correlated with parameters of hemostasis and proteins connected to hemostasis in at least one study group. The full correlation tables are presented in Tables S6 (AMI post-COVID), S7 (AMI control), S8 (control post-COVID), S9 (control). Full correlation tables include all the 81 proteins and all the parameters of hemostasis analyzed in the study, and p adjustment was done for this list of correlations.

Correlations with  $p$  adj.  $< 0.05$  and Spearman's correlation coefficient  $> 0.3$  are shown. Red – positive correlations, blue – negative correlations. Parameters of coagulation blood tests: PT - prothrombin time (sec), PT Quick – Quick prothrombin time test (%). Parameters of rotational thromboelastometry: CFT - clot formation time (sec), A10-A30 - clot amplitudes at 10-30 min (mm), MCF - maximum clot firmness (mm),  $\alpha$  - angle between the middle axis and the tangential line to the clotting curve through the 2-mm amplitude point ( $^{\circ}$ ). Parameters of thrombodynamics: CS - clot size ( $\mu\text{m}$ ), D - clot density (arb units), LOT - lysis onset time (min), LP - the rate of lysis progression (%/min), CLT - the clot lysis time (min), LI - percent of remaining clot density (%), LTE - the expected clot lysis time (min). (A) AMI post-COVID group; (B) AMI control group; (C) control post-COVID group; (D) control group.

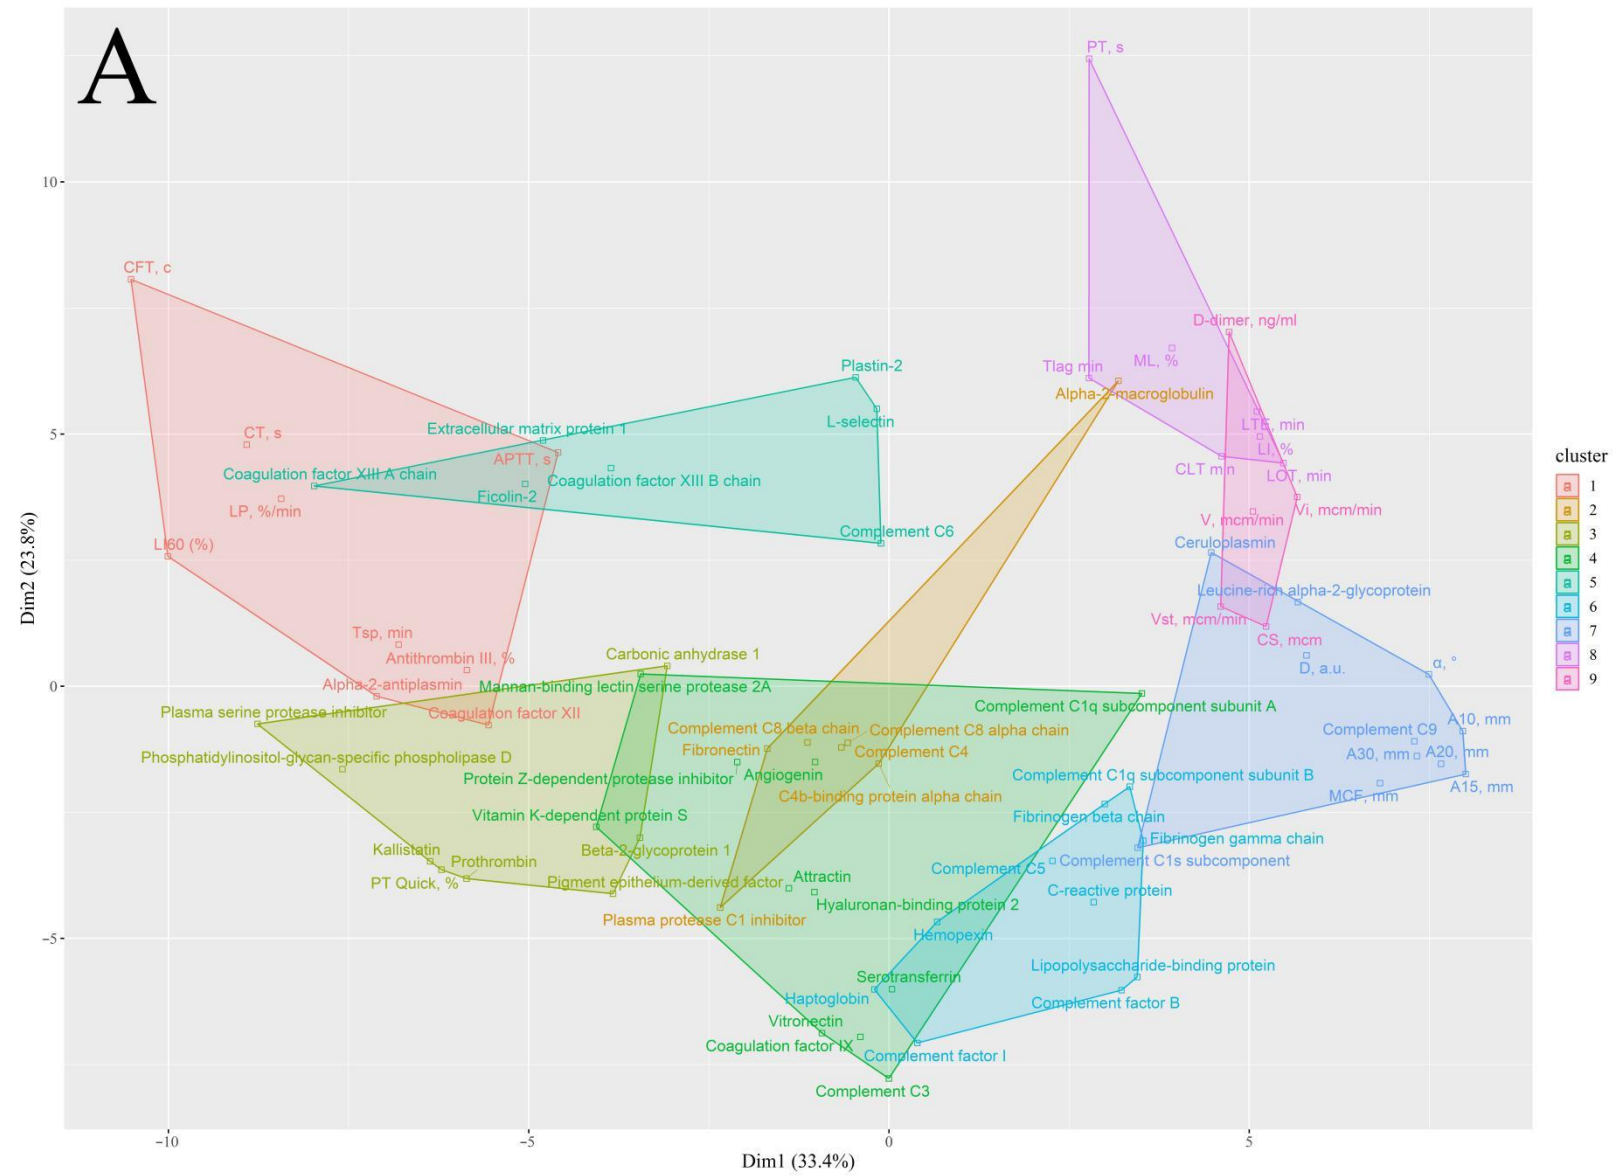



matrix used as a matrix of distance. For defining the number of clusters, we used gap-statistics via bootstrapping with Monte-Carlo simulation and different centroids. Parameters of coagulation blood tests: APTT - activated partial thromboplastin time (sec), PT - prothrombin time (sec), PT Quick – Quick prothrombin time test (%). Parameters of rotational thromboelastometry: CT - clotting time (sec), CFT - clot formation time (sec), A10-A30 - clot amplitudes at 10-30 min (mm), MCF - maximum clot firmness (mm),  $\alpha$  - angle between the middle axis and the tangential line to the clotting curve through the 2-mm amplitude point ( $^{\circ}$ ), LI60 - clot lysis index at 60 min (%), ML - maximum lysis (%). Parameters of thrombodynamics: V - clot growth rate ( $\mu\text{m} / \text{min}$ ),  $V_i$  - initial clot growth rate ( $\mu\text{m} / \text{min}$ ),  $V_{st}$  – stationary clot growth rate ( $\mu\text{m} / \text{min}$ ), Tlag - Lag-time, the delay between the test start and the clot formation onset (min), CS - clot size ( $\mu\text{m}$ ), D - clot density (arb units), Tsp - spontaneous clots formation time (min), LOT - lysis onset time (min), LP - the rate of lysis progression (%/min), CLT - the clot lysis time (min), LI - percent of remaining clot density (%), LTE - the expected clot lysis time (min).  
(**A**) control post-COVID group; (**B**) control group.

### **Validation of proteomics results for C-reactive protein and fibrinogen beta chain**

To validate the results of targeted proteomics we measured C-reactive protein and fibrinogen with other methods.

Blood was collected in S-Monovette 7,5 ml Z-Gel (REF 01.1602.001) tubes for C-reactive protein and S-Monovette 5 ml 9NC (REF 05.10I 71.001) tubes for fibrinogen measurement. C-reactive protein (CRP) was measured on Siemens ADVIA 2400 Chemistry Analyzer (Siemens Healthcare Diagnostics Inc, USA) with ADVIA® Chemistry Wide Range C-Reactive Protein Reagents (REF 829585). Clauss fibrinogen was automatically calculated after measurement on ACL TOP 300 CTS (Instrumentation Laboratory, USA) with HemosIL Fibrinogen-C XL (REF 00020003900).

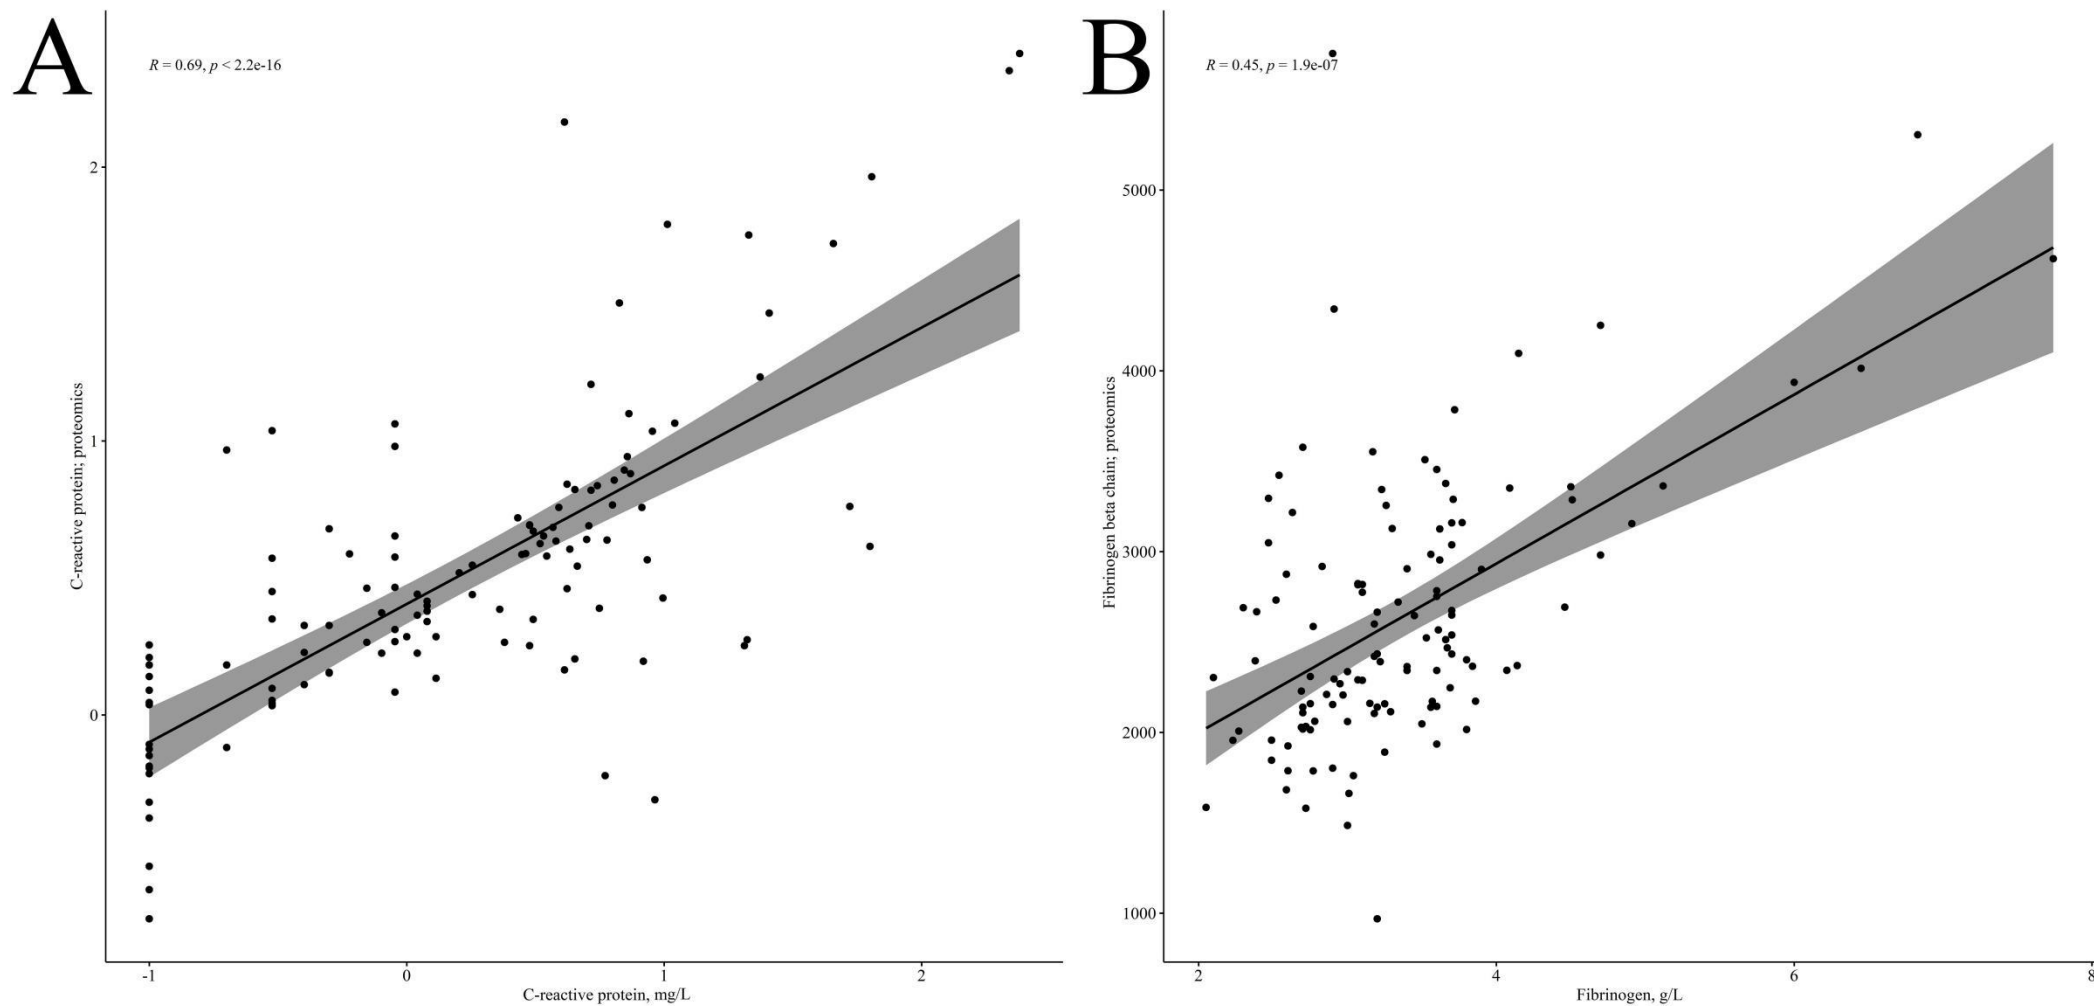

**Figure S6.** Validation of the results of targeted proteomics measured by liquid chromatography-tandem mass spectrometry (LC-MS/MS) with multiple reaction monitoring (MRM) with other methods. **(A)** correlation of C-reactive protein measured by proteomics (Y axis) with C-reactive protein measured on Siemens ADVIA 2400 Chemistry Analyzer, Spearman's correlation coefficient = 0.69,  $p < 0.05$ ; **(B)** correlation of fibrinogen beta chain measured by proteomics with Clauss fibrinogen measured on ACL TOP 300 CTS, Spearman's correlation coefficient = 0.45,  $p < 0.05$ .
